# Supplementary material for: Graph-Based Analysis of the Metabolic Exchanges between Two Co-Resident Intracellular Symbionts, Baumannia cicadellinicola and Sulcia muelleri, with Their Insect Host, Homalodisca coagulata
Source: PubMed Central journal article supplement (PMC2936742; doi:10.1371/journal.pcbi.1000904), 2010-09-02

**Figure S8.** Sub-network corresponding to the production of co-enzyme A from  $\beta$ -alanine, glucose, aspartate, glycine, serine, threonine and keto-isovalerate in *B. cicadellinicola*. Squares correspond to reactions and circles to metabolites. The colour of the edges differentiates the two sides of a reaction.

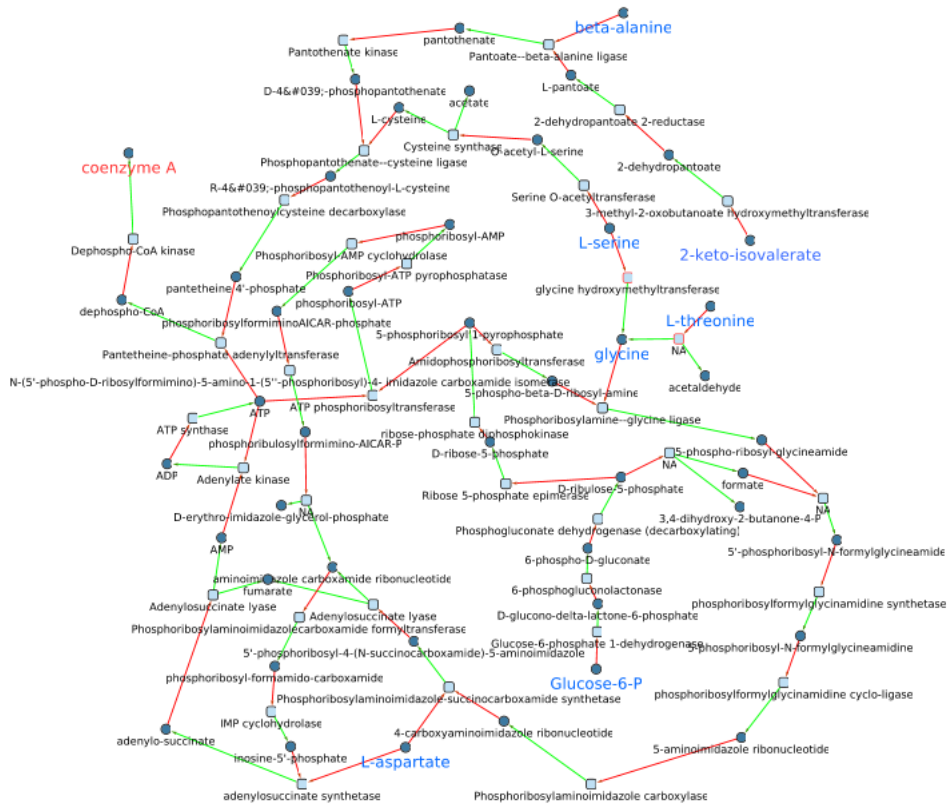

Supplement: pcbi.1000904.s012.pdf [file pcbi.1000904.s012.pdf]
