# Supplementary material for: Graph-Based Analysis of the Metabolic Exchanges between Two Co-Resident Intracellular Symbionts, Baumannia cicadellinicola and Sulcia muelleri, with Their Insect Host, Homalodisca coagulata
Source: PubMed Central journal article supplement (PMC2936742; doi:10.1371/journal.pcbi.1000904), 2010-09-02

**Figure S16.** Sub-network corresponding to the production of heme from glucose and protoheme in *B. cicadellinicola*. Squares correspond to reactions and circles to metabolites. The colour of the edges differentiates the two sides of a reaction.

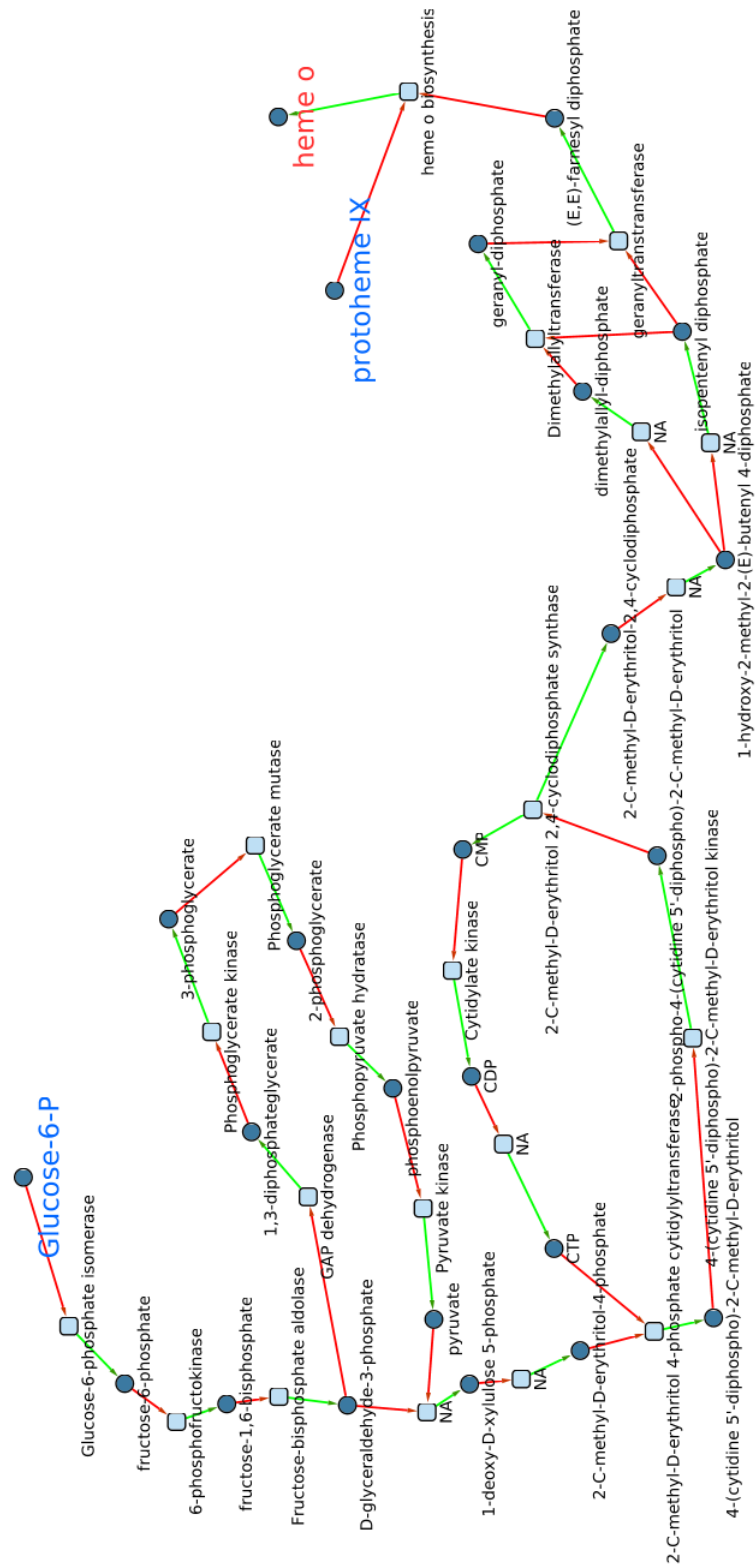

Supplement: pcbi.1000904.s020.pdf [file pcbi.1000904.s020.pdf]
