# Supplementary material for: Graph-Based Analysis of the Metabolic Exchanges between Two Co-Resident Intracellular Symbionts, Baumannia cicadellinicola and Sulcia muelleri, with Their Insect Host, Homalodisca coagulata
Source: PubMed Central journal article supplement (PMC2936742; doi:10.1371/journal.pcbi.1000904), 2010-09-02
Supplement: pcbi.1000904.s025.pdf [file pcbi.1000904.s025.pdf]

**Table S1.** Reactions manually removed from the automatic reconstruction of the small-molecule metabolism of *S. muelleri*. **IR:** isolated reaction; **ES:** enzyme specificity misannotation; **MM:** reaction involving macromolecules out of the scope of the study.

| Reaction BioCyc ID                    | Name                                    | Formula                                                                                                                                                         | Evidence to remove it |
|---------------------------------------|-----------------------------------------|-----------------------------------------------------------------------------------------------------------------------------------------------------------------|-----------------------|
| 2-OCTAPRENYL-METHOXY-BENZOQ-METH-RXN  | NA                                      | S-adenosyl-L-methionine + 2-octaprenyl-6-methoxy-1,4-benzoquinol → H <sup>+</sup> + S-adenosyl-L-homocysteine + 2-octaprenyl-3-methyl-6-methoxy-1,4-benzoquinol | IR, ES                |
| HYDROXYPYRROLINED EH-RXN              | 1-pyrroline-5-carboxylate dehydrogenase | H <sub>2</sub> O + NAD <sup>+</sup> + pyrroline-hydroxy-carboxylate → H <sup>+</sup> + L-erythro-4-hydroxy-glutamate + NADH                                     | IR, ES                |
| RXN0-2625                             | NA                                      | a mismatched DNA base pair ↔ a properly matched DNA base                                                                                                        | IR, MM                |
| 3-SULFINOALANINE-AMINOTRANSFERASE-RXN | NA                                      | 2-oxoglutarate + 3-sulfinoalanine → L-glutamate + 3-sulfinyl-pyruvate                                                                                           | IR, ES                |
| DIHYDLIPOXN-RXN                       | lipoamide dehydrogenase                 | dihydrolipoamide + NAD <sup>+</sup> ↔ lipoamide + NADH + H <sup>+</sup>                                                                                         | IR, ES                |
| 2.8.1.8-RXN                           | lipoyl synthase                         | a protein<br>6-N-(octanoyl)lysine + 2 S <sub>0</sub> + 2 S-adenosyl-L-methionine ↔ a protein<br>6-N-(lipoyl)lysine + 2 L-methionine + 2 5'-deoxyadenosine       | IR, MM                |
| TRNA-PSEUDOURIDINE-SYNTHASE-I-RXN     | tRNA-pseudouridine synthase I           | tRNA uridine ↔ H <sup>+</sup> + tRNA pseudouridine                                                                                                              | IR, MM                |
| 3.5.1.88-RXN                          | Peptide deformylase                     | H <sub>2</sub> O + formyl-L-methionyl peptide ↔ formate + H <sup>+</sup> + methionyl peptide                                                                    | IR, MM                |
| OPPSYN-RXN                            | NA                                      | isopentenyl diphosphate + a trans-polyisoprenyln-PP ↔ diphosphate + a trans-polyisoprenyln-PP                                                                   | IR                    |
| SUCCGLU-SEMIALDEHYDE-SUCCGLU-RXN      | NA                                      | N <sup>2</sup> -succinyl-L-glutamate 5-semialdehyde + NAD <sup>+</sup> ↔ N <sup>2</sup> -succinylglutamate + NADH                                               | IR                    |
| 2OXOGLUTARATEDEH-RXN                  | NA                                      | coenzyme A + NAD <sup>+</sup> + 2-oxoglutarate → NADH + succinyl-CoA + CO <sub>2</sub>                                                                          | IR, ES                |
| RXN-10                                | NA                                      | ATP + L-aspartate + O-ureidohomoserine → H <sup>+</sup> + diphosphate + canavaninosuccinate + adenosine-5'-phosphate                                            | IR, ES                |
| RXN-22                                | NA                                      | Canavaninosuccinate → fumarate + L-canavanine                                                                                                                   | IR, ES                |
| RXN-9                                 | NA                                      | carbamoyl-phosphate + L-canaline → phosphate + O-ureidohomoserine                                                                                               | IR, ES                |
| SELENOCYSTEINE-LYASE-RXN              | Selenocysteine lyase                    | a reduced electron acceptor + L-selenocysteine ↔ selenide + L-alanine + an oxidized electron acceptor                                                           | MM                    |

| <b>Reaction BioCyc ID</b> | <b>Name</b> | <b>Formula</b>                                                                                      | <b>Evidence to remove it</b> |
|---------------------------|-------------|-----------------------------------------------------------------------------------------------------|------------------------------|
| RXN0-2023                 | NA          | L-cysteine + ATP + uridine ↔ diphosphate + L-alanine<br>+<br>2-thiouridine + adenosine-5'-phosphate | MM                           |
