# Supplementary material for: Graph-Based Analysis of the Metabolic Exchanges between Two Co-Resident Intracellular Symbionts, Baumannia cicadellinicola and Sulcia muelleri, with Their Insect Host, Homalodisca coagulata
Source: PubMed Central journal article supplement (PMC2936742; doi:10.1371/journal.pcbi.1000904), 2010-09-02
Supplement: pcbi.1000904.s026.pdf [file pcbi.1000904.s026.pdf]

**Table S2.** Reactions manually removed from the automatic reconstruction of the small-molecule metabolism of *B. cicadellincola*. **GR:** generic reaction; **IR:** isolated reactions; **ES:** enzyme specificity misannotations; **MM:** reactions involving macromolecules out of the scope of the study; **NC:** reactions not corresponding to carbon atom transfers

| Reaction BioCyc ID                | Name                                                                      | Formula                                                                                                                                                                                                                       | Evidence to remove it |
|-----------------------------------|---------------------------------------------------------------------------|-------------------------------------------------------------------------------------------------------------------------------------------------------------------------------------------------------------------------------|-----------------------|
| MALATE-DEHYDROGENASE-ACCEPTOR-RXN | Malate dehydrogenase (acceptor)                                           | malate + an oxidized electron acceptor → a reduced electron acceptor + oxaloacetate                                                                                                                                           | GR                    |
| RXN-6401                          | NA                                                                        | pantoyl lactone + beta-alanine ↔ pantothenate                                                                                                                                                                                 | ES, IR                |
| 2.8.1.8-RXN                       | Lipoyl synthase                                                           | a protein 6-N-(octanoyl)lysine + 2 S0 + 2 S-adenosyl-L-methionine ↔ a protein 6-N-(lipoyl)lysine + 2 L-methionine + 2 D'-deoxyadenosine                                                                                       | MM                    |
| QUINOLINATE-SYNTHETASE-MULTI-RXN  | quinolinate synthetase                                                    | L-aspartate + dihydroxy-acetone phosphate + O2 ↔ quinolinate + phosphate + H2O2 + 2 H2O                                                                                                                                       | ES                    |
| PTAALT-RXN                        | NA                                                                        | phosphate + propionyl-CoA → coenzyme A + propionyl-P                                                                                                                                                                          | IR                    |
| UPPSYN-RXN                        | NA                                                                        | isopentenyl diphosphate + a cis,trans-polyisoprenyl-PP ↔ diphosphate + a cis,trans-polyisoprenyl-PP                                                                                                                           | GR, IR                |
| DECAPCISTRANSFER-RXN              | di-trans-poly-cis-decaprenylcistransferase                                | di-trans,poly-cis-decaprenyl diphosphate + isopentenyl diphosphate ↔ diphosphate + di-trans,poly-cis-undecaprenyl diphosphate                                                                                                 | ES, IR                |
| 1.17.1.2-RXN                      | 4-hydroxy-3-methylbut-2-enyl diphosphate reductase                        | Isopentenyl diphosphate + NAD(P) <sup>+</sup> + H2O ↔ (E)-4-hydroxy-3-methyl but2-en-1-yl diphosphate + NAD(P)H                                                                                                               | ES                    |
| 6.3.2.10-RXN                      | UDP-N-acetylmuramoyl alanine-D-glutamyl-lysine--D-alanyl-D-alanine ligase | D-alanyl-D-alanine + UDP-N-acetylmuramoyl-L-alanyl-D-glutamyl-L-lysine + ATP → H <sup>+</sup> + ADP + phosphate + UDP-N-acetylmuramoyl-L-alanyl-D-glutamyl-L-lysyl-D-alanyl-D-alanine                                         | ES, IR                |
| RXN-8975                          | Phospho-N-acetylmuramoyl-pentapeptide-transferase                         | UDP-N-acetylmuramoyl-L-alanyl-D-glutamyl-L-lysyl-D-alanyl-D-alanine + di-trans,poly-cis-undecaprenyl phosphate → N-acetylmuramoyl-L-alanyl-D-glutamyl-L-lysyl-D-alanyl-D-alanine-diphosphoundecaprenol + uridine-5'-phosphate | ES, IR                |
| NUCLEOSIDE-DIP-KIN-RXN            | Nucleoside-diphosphate kinase                                             | ATP + a ribonucleoside diphosphate ↔ ADP + a ribonucleoside triphosphate                                                                                                                                                      | GR                    |
| RXN0-1                            | NA                                                                        | H2O + a 2'-deoxyribonucleoside diphosphate + an oxidized electron acceptor ↔ a reduced electron acceptor + a ribonucleoside diphosphate                                                                                       | GR                    |
| RXN-7241                          | NA                                                                        | H2O + phytate → phosphate + D-myo-inositol (1,2,3,5,6) pentakisphosphate                                                                                                                                                      | IR                    |
| 6-PHYT-RXN                        | 6-phytase                                                                 | H2O + phytate → D-myo-inositol (1,2,3,4,5)-pentakisphosphate + phosphate                                                                                                                                                      | IR                    |
| DIHYDLIPOXN-RXN                   | NA                                                                        | Dihydrolipoamide + NAD <sup>+</sup> ↔ lipoamide + NADH                                                                                                                                                                        | IR, ES                |
| 2-6-1-57-RXN                      | aromatic amino acid aminotransferase                                      | an aromatic amino acid + 2-ketoglutarate ↔ an aromatic oxo-acid + L-glutamate                                                                                                                                                 | IR, GR                |

| Reaction BioCyc ID                     | Name                                      | Formula                                                                                                                                                                                                                           | Evidence to remove it |
|----------------------------------------|-------------------------------------------|-----------------------------------------------------------------------------------------------------------------------------------------------------------------------------------------------------------------------------------|-----------------------|
| R343-RXN                               | Cob(II)yrinic acid a,c-diamide reductase  | $H^+ + FMN + \text{cob(II)yrinate a,c-diamide} \rightarrow FMNH_2 + \text{cob(I)yrinate a,c-diamide}$                                                                                                                             | IR                    |
| 2.6.1.7-RXN                            | Kynurenine--oxoglutarate aminotransferase | $2\text{-oxoglutarate} + \text{kynurenine} \leftrightarrow 4\text{-(2-aminophenyl)-2,4-dioxobutanoate} + \text{L-glutamate}$                                                                                                      | IR, ES                |
| MYO-INOSITOL-1OR-4-MONOPHOSPHATASE-RXN | Myo-inositol-1(or 4)-monophosphatase      | $H_2O + \text{D-myoinositol (3)-monophosphate} \rightarrow \text{phosphate} + \text{myoinositol}$                                                                                                                                 | IR                    |
| RXN0-5063                              | NA                                        | $\text{N-6-isopentyl adenosine-37 tRNA} + \text{S-adenosyl-L-methionine} \leftrightarrow \text{S-adenosyl-L-homocysteine} + 2\text{-methylthio-N-6-isopentyl adenosine-37 tRNA} + 5'\text{-deoxyadenosine} + \text{L-methionine}$ | IR                    |
| 1-7-1-13-RXN                           | queuine synthase                          | $\text{queuine} + 2 \text{NADP}^+ \leftrightarrow 7\text{-cyano-7-carbaguanine}$                                                                                                                                                  | IR                    |
| 2-HEXADECENAL-REDUCTASE-RXN            | 2-hexadecenal reductase                   | $2\text{-trans-Hexadecenal} + H^+ + \text{NADPH} \rightarrow \text{palmitaldehyde} + \text{NADP}^+$                                                                                                                               | IR                    |
| 3-1-13-1-RXN                           | Exoribonuclease II                        | $\text{an RNA} \leftrightarrow \text{a nucleoside-5'-phosphate} + \text{an RNA}$                                                                                                                                                  | IR                    |
| PSERTRANSAM-RXN                        | Phosphoserine aminotransferase            | $\text{L-glutamate} + 3\text{-phospho-hydroxypyruvate} \rightarrow 2\text{-oxoglutarate} + 3\text{-phospho-serine}$                                                                                                               | IR                    |
| RXN-7958                               | NA                                        | $\text{ATP} + \text{propionate} \leftrightarrow \text{ADP} + \text{propionyl-P}$                                                                                                                                                  | IR                    |
| RXN0-4022                              | NA                                        | $H^+ + 7\text{-cyano-7-deazaguanine} + \text{NADPH} \leftrightarrow 7\text{-aminomethyl-7-deazaguanine} + \text{NADP}^+$                                                                                                          | IR                    |
| NADH-DEHYDROGENASE-QUINONE-RXN         | NADH dehydrogenase (quinone)              | $\text{NADH} + \text{a quinone} \leftrightarrow \text{a hydroquinone} + \text{NAD}^+$                                                                                                                                             | IR, GR                |
| CARBOXYLESTERASE-RXN                   | carboxylesterase                          | $H_2O + \text{a carboxylic ester} \leftrightarrow \text{an alcohol} + \text{a carboxylate}$                                                                                                                                       | IR, GR                |
| RXN0-5225                              |                                           | $H_2O + \text{GlcNAc-1,6-anhMurNAc-L-Ala-gamma-D-Glu-DAP-D-Ala} \leftrightarrow \text{L-Ala-gamma-D-Glu-DAP-D-Ala} + \text{GlcNAc-1,6-anhMurNAc}$                                                                                 | IR                    |
| POLYPHOSPHATE-KINASE-RXN               | Polyphosphate kinase                      | $\text{long chain polyphosphate} + \text{ATP} \leftrightarrow \text{long chain polyphosphate} + \text{ADP}$                                                                                                                       | IR                    |
| PEPTIDYLPROLYL-ISOMERASE-RXN           | Peptidylprolyl isomerase                  | $\text{peptidylproline (omega} = 180) \leftrightarrow \text{peptidylproline (omega} = 0)$                                                                                                                                         | IR                    |
| RXN0-5063                              | NA                                        | $\text{N-6-isopentyl adenosine-37 tRNA} + \text{S-adenosyl-L-methionine} \leftrightarrow \text{S-adenosyl-L-homocysteine} + 2\text{-methylthio-N-6-isopentyl adenosine-37 tRNA} + 5'\text{-deoxyadenosine} + \text{L-methionine}$ | IR                    |
| RXN-7919                               | NA                                        | $\text{S-(2-hydroxyacyl)glutathione} + H_2O \leftrightarrow \text{glutathione} + \text{a 2-hydroxy carboxylate}$                                                                                                                  | IR, GR                |
| GLYOXII-RXN                            | Hydroxy acylglutathione hydrolase         | $H_2O + \text{S-lactoyl-glutathione} \rightarrow H^+ + \text{D-lactate} + \text{glutathione}$                                                                                                                                     | IR                    |
| DNA-LIGASE-NAD43-RXN                   | DNA ligase (NAD <sup>+</sup> )            | $\text{a deoxynucleotide} + \text{NAD}^+ + (\text{deoxynucleotides})(m) \leftrightarrow \text{a deoxynucleotide} + \text{nicotinamide mononucleotide} + \text{adenosine-5'-phosphate}$                                            | IR                    |

| Reaction BioCyc ID                     | Name                                        | Formula                                                                                                                                                                     | Evidence to remove it |
|----------------------------------------|---------------------------------------------|-----------------------------------------------------------------------------------------------------------------------------------------------------------------------------|-----------------------|
| 4.6.1.10-RXN                           | 6-pyruvoyl tetrahydropterin synthase        | 2-amino-4-oxo-6-(erythro-1',2',3'-trihydroxypropyl)-7,8-dihydroxypteridine triphosphate $\leftrightarrow$ PPPi + 2-amino-4-oxo-6-(1',2'-dioxopropyl)-7,8-dihydroxypteridine | IR, ES                |
| ADPSUGPPHOSPHAT-RXN                    | ADP-sugar diphosphatase                     | H <sub>2</sub> O + an ADP-sugar $\leftrightarrow$ an alpha-D-aldose-1-phosphate + adenosine-5'-phosphate                                                                    | IR, GR                |
| SELENOCYSTEINE-LYASE-RXN               | Selenocysteine lyase                        | a reduced electron acceptor + L-selenocysteine $\leftrightarrow$ selenide + L-alanine + an oxidized electron acceptor                                                       | MM                    |
| GMKALT-RXN                             | T2-induced deoxynucleotide kinase           | dGMP + ATP $\leftrightarrow$ H <sup>+</sup> + 2'-deoxyguanosine-5'-diphosphate + ADP                                                                                        | ES                    |
| RXN0-308                               | NA                                          | a protein L-cysteine + L-cysteine $\rightarrow$ L-alanine + a protein-S-sulfanylcysteine                                                                                    | MM                    |
| TRYPTOPHAN-AMINOTRANSFERASE-RXN        | Tryptophan aminotransferase                 | L-tryptophan + 2-oxoglutarate $\rightarrow$ L-glutamate + indole-3-pyruvate                                                                                                 | IR, ES                |
| 2-6-1-58-RXN                           | Phenylalanine (histidine) aminotransferase  | L-phenylalanine + pyruvate $\rightarrow$ L-alanine + phenylpyruvate                                                                                                         | ES                    |
| PHEAMINOTRANS-RXN                      | Aromatic amino acid transferase             | L-glutamate + phenylpyruvate $\leftrightarrow$ L-phenylalanine + 2-oxoglutarate                                                                                             | ES                    |
| 2-6-1-28-RXN                           | Tryptophan--phenylpyruvate aminotransferase | L-tryptophan + phenylpyruvate $\rightarrow$ L-phenylalanine + indole-3-pyruvate                                                                                             | ES                    |
| TYRAMINOTRANS-RXN                      | Aromatic amino acid transferase             | L-glutamate + 4-hydroxyphenylpyruvate $\leftrightarrow$ L-tyrosine + 2-oxoglutarate                                                                                         | ES                    |
| RXN0-2023                              | NA                                          | L-cysteine + ATP + uridine $\leftrightarrow$ diphosphate + L-alanine + 2-thiouridine + adenosine-5'-phosphate                                                               | MM                    |
| PSEUDOURIDYLATE-SYNTHASE-RXN           | Pseudouridylate synthase                    | uracil + D-ribose-5-phosphate $\leftrightarrow$ H <sub>2</sub> O + pseudouridine 5'-phosphate                                                                               | MM                    |
| RXN0-1441                              | ADP-ribose pyrophosphatase                  | ADP-ribose + H <sub>2</sub> O $\leftrightarrow$ H <sup>+</sup> + D-ribose-5-phosphate + adenosine-5'-phosphate                                                              | MM                    |
| RXN-8631                               | NA                                          | fructose-1-phosphate $\leftrightarrow$ glyceraldehyde + dihydroxyacetone phosphate                                                                                          | ES                    |
| GLYCEROL-3-PHOSPHATE-DEHYDROGENASE-RXN | NA                                          | sn-glycerol-3-phosphate + an oxidized electron acceptor $\leftrightarrow$ dihydroxy-acetone phosphate + a reduced electron acceptor                                         | GR                    |
| SULFITE-REDUCTASE-RXN                  | Sulfite reductase                           | H <sub>2</sub> O + hydrogen sulfide + an oxidized electron acceptor $\leftrightarrow$ a reduced electron acceptor + sulfite                                                 | GR                    |
| HEMN-RXN                               | NA                                          | coproporphyrinogen III + S-adenosyl-L-methionine $\rightarrow$ 5'-deoxyadenosine + L-methionine + protoporphyrinogen IX + CO <sub>2</sub>                                   | IR                    |
| 3-5-1-88-RXN                           | Peptide deformylase                         | H <sub>2</sub> O + formyl-L-methionyl peptide $\leftrightarrow$ formate + H <sup>+</sup> + methionyl peptide                                                                | MM                    |
| OHMETPYRKIN-RXN                        | Hydroxymethyl pyrimidine kinase             | ATP + hydroxymethylpyrimidine $\rightarrow$ H <sup>+</sup> + hydroxymethylpyrimidine phosphate + ADP                                                                        | IR                    |
| RXN-6182                               | NA                                          | alpha-D-glucose 6-phosphate $\rightarrow$ D-fructose-6-phosphate                                                                                                            | ES                    |

| <b>Reaction BioCyc ID</b> | <b>Name</b>                                      | <b>Formula</b>                                                                    | <b>Evidence to remove it</b> |
|---------------------------|--------------------------------------------------|-----------------------------------------------------------------------------------|------------------------------|
| 3-6-1-41-RXN              | Bis(5'-nucleosyl)-tetraphosphatase (symmetrical) | 5',5''-diadenosine tetraphosphate + H <sub>2</sub> O ↔ H <sup>+</sup> + ADP       | IR                           |
| GLYC3PDEHYDROG-RXN        | Glycerol-3-phosphate dehydrogenase               | sn-glycerol-3-phosphate + ubiquinone-8 → ubiquinol-8 + dihydroxyacetone phosphate | IR, ES                       |
| CYT-UBIQUINOL-OXID-RXN    | NA                                               | ubiquinol-8 + oxygen ↔ H <sub>2</sub> O + ubiquinone-8                            | IR, ES                       |
