# Supplementary material for: Graph-Based Analysis of the Metabolic Exchanges between Two Co-Resident Intracellular Symbionts, Baumannia cicadellinicola and Sulcia muelleri, with Their Insect Host, Homalodisca coagulata
Source: PubMed Central journal article supplement (PMC2936742; doi:10.1371/journal.pcbi.1000904), 2010-09-02
Supplement: pcbi.1000904.s027.pdf [file pcbi.1000904.s027.pdf]

**Table S3.** List of reactions in the metabolic network we build for *S. muelleri* and the evidences used to assign the direction of the reactions. The metabolites kept in the reactions after filtering appear in bold. **M:** MetaCyc pathways evidence; **T:** topological evidence

| Reaction BioCyc ID            | Name                                                   | Formula                                                                                                                                | Evidence to assign the direction |
|-------------------------------|--------------------------------------------------------|----------------------------------------------------------------------------------------------------------------------------------------|----------------------------------|
| PHEAMINOTRANS-RXN             | Aromatic amino acid transferase                        | L-glutamate + <b>phenylpyruvate</b> → <b>L-phenylalanine</b> + 2-ketoglutarate                                                         | T                                |
| ACETOLACTREDUCTOISOM-RXN      | Ketol-acid reductoisomerase                            | H <sup>+</sup> + NADPH + 2- <b>acetolactate</b> → <b>2,3-dihydroxyisovalerate</b> + NADP <sup>+</sup>                                  | M                                |
| CARBPSYN-RXN                  | carbamoyl-phosphate synthetase (glutamine-hydrolysing) | L-glutamine + <b>HCO<sub>3</sub><sup>-</sup></b> + ATP + H <sub>2</sub> O → <b>carbamoyl-phosphate</b> + ADP + phosphate + L-glutamate | M                                |
| 3-ISOPROPYLMALDEHYDROG-RXN    | 3-isopropylmalate dehydrogenase                        | NAD <sup>+</sup> + 3- <b>isopropylmalate</b> → 2- <b>isopropyl-3-oxosuccinate</b> + NADH + H <sup>+</sup>                              | M                                |
| CHORISMATEMUT-RXN             | Chorismate mutase                                      | <b>Chorismate</b> → <b>prephenate</b>                                                                                                  | M                                |
| ASPAMINOTRANS-RXN             | Aspartate aminotransferase                             | 2-ketoglutarate + <b>L-aspartate</b> ↔ <b>oxaloacetate</b> + L-glutamate                                                               |                                  |
| ASPARTATEKIN-RXN              | Aspartate kinase                                       | ATP + <b>L-aspartate</b> → ADP + <b>L-aspartyl-4-phosphate</b>                                                                         | M                                |
| ACETYLORNTRANSAM-RXN          | Acetylornithine aminotransferase                       | L-glutamate + <b>N-acetyl-L-glutamate 5-semialdehyde</b> → 2-ketoglutarate + <b>N-acetyl-L-ornithine</b>                               | M                                |
| ACETYLGLUTKIN-RXN             | Acetylglutamate kinase                                 | <b>N-acetyl-L-glutamate</b> + ATP → <b>N-acetylglutamyl-phosphate</b> + ADP                                                            | M                                |
| RXN-7562                      | Acetylornithine aminotransferase                       | <b>L-ornithine</b> + 2-ketoglutarate ↔ L-glutamate + <b>L-glutamate gamma-semialdehyde</b>                                             | M                                |
| ADOMET-DMK-METHYLTRANSFER-RXN | NA                                                     | S-adenosyl-L-methionine + <b>demethylmenaquinone-8</b> → <b>menaquinone-8</b> + S-adenosyl-L-homocysteine                              | M                                |
| RXN-7800                      | NA                                                     | 2- <b>isopropyl-3-oxosuccinate</b> → 2- <b>ketoisocaproate</b> + CO <sub>2</sub>                                                       | M                                |
| PRAISOM-RXN                   | Phosphoribosyl anthranilate isomerase                  | <b>N-(5'-phosphoribosyl)-anthranilate</b> → <b>1-(o-carboxyphenylamino)-1'-deoxyribulose-5'-phosphate</b>                              | M                                |
| SUCCINYLDIAMINOPIMITRANS-RXN  | Succinyl diaminopimelate aminotransferase              | L-glutamate + <b>N-succinyl-2-amino-6-ketopimelate</b> → <b>N-succinyl-L,L-2,6-diaminopimelate</b> + 2-ketoglutarate                   | M                                |
| ACETOLACTSYN-RXN              | Acetolactate synthase                                  | <b>Pyruvate</b> → 2- <b>acetolactate</b> + CO <sub>2</sub>                                                                             | M                                |
| HOMOSERDEHYDROG-RXN           | Homoserine dehydrogenase                               | H <sup>+</sup> + NAD(P)H + <b>L-aspartate-semialdehyde</b> → NAD(P) <sup>+</sup> + <b>homoserine</b>                                   | M                                |
| RXN-7183                      | NA                                                     | <b>pyrroline 5-carboxylate</b> + NAD(P) <sup>+</sup> + H <sub>2</sub> O → <b>L-glutamate</b> + NAD(P)H + H <sup>+</sup>                | M                                |
| HOMOSERKIN-RXN                | Homoserine kinase                                      | <b>homoserine</b> + ATP → ADP + <b>O-phospho-L-homoserine</b>                                                                          | M                                |

| Reaction BioCyc ID                 | Name                                                           | Formula                                                                                                                                                              | Evidence to assign the direction |
|------------------------------------|----------------------------------------------------------------|----------------------------------------------------------------------------------------------------------------------------------------------------------------------|----------------------------------|
| ACETOOHBUTREDUCTO ISOM-RXN         | Ketol-acid reducto isomerase                                   | $\text{NADPH} + 2\text{-aceto-2-hydroxy-butyrate} \rightarrow 2,3\text{-dihydroxy-3-methylvalerate} + \text{NADP}^+$                                                 | M                                |
| TETHYDPICSUCC-RXN                  | 2,3,4,5-tetrahydropyridine-2-carboxylate N-succinyltransferase | $\text{H}_2\text{O} + \text{tetrahydrodipicolinate} + \text{succinyl-CoA} \rightarrow \text{coenzyme A} + \text{N-succinyl-2-amino-6-ketopimelate}$                  | M                                |
| N-ACETYLGLUTPREDUCT-RXN            | N-acetyl-gamma-glutamyl-phosphate reductase                    | $\text{N-acetylglutamyl-phosphate} + \text{NADPH} \rightarrow \text{N-acetyl-L-glutamate 5-semialdehyde} + \text{NADP}^+ + \text{phosphate}$                         | M                                |
| 2461463469-RXN                     | NA                                                             | $\text{carbamoyl-phosphate} + \text{N-acetyl-L-ornithine} \rightarrow \text{N-acetyl-L-citrulline} + \text{phosphate}$                                               | M                                |
| 3-DEHYDROQUINATE-DEHYDRATASE-RXN   | 3-dehydroquinate dehydratase                                   | $3\text{-dehydroquinate} \rightarrow 3\text{-dehydro-shikimate} + \text{H}_2\text{O}$                                                                                | M                                |
| THRESYN-RXN                        | Threonine synthase                                             | $\text{H}_2\text{O} + \text{O-phospho-L-homoserine} \rightarrow \text{L-threonine} + \text{phosphate}$                                                               | M                                |
| RXN0-2381                          | NA                                                             | $\text{indole-3-glycerol-phosphate} \rightarrow \text{D-glyceraldehyde-3-phosphate} + \text{indole}$                                                                 | M                                |
| SHIKIMATE-5-DEHYDROGENASE-RXN      | Shikimate 5-dehydrogenase                                      | $3\text{-dehydro-shikimate} + \text{NADPH} \rightarrow \text{shikimate} + \text{NADP}^+$                                                                             | M                                |
| N-ACETYLTRANSFER-RXN               | Amino-acid N-acetyltransferase                                 | $\text{L-glutamate} + \text{acetyl-CoA} \rightarrow \text{coenzyme A} + \text{N-acetyl-L-glutamate}$                                                                 | M                                |
| 2-ISOPROPYLMALATESYN-RXN           | 2-isopropylmalate synthase                                     | $\text{H}_2\text{O} + \text{acetyl-CoA} + 2\text{-keto-isovalerate} \rightarrow \text{coenzyme A} + 2\text{-isopropylmalate}$                                        | M                                |
| CHORISMATE-SYNTHASE-RXN            | Chorismate synthase                                            | $5\text{-enolpyruvyl-shikimate-3-phosphate} \rightarrow \text{phosphate} + \text{chorismate}$                                                                        | M                                |
| TRYPSYN-RXN                        | Tryptophan synthase                                            | $\text{L-serine} + \text{indole-3-glycerol-phosphate} \rightarrow \text{L-tryptophan} + \text{D-glyceraldehyde-3-phosphate} + \text{H}_2\text{O}$                    | T                                |
| RXN-8991                           | 3-isopropylmalate dehydratase                                  | $\text{Isopropylmaleate} + \text{H}_2\text{O} \rightarrow 3\text{-isopropylmalate}$                                                                                  | M                                |
| DIAMINOPIMEPIM-RXN                 | Diamino pimelate epimerase                                     | $\text{L,L-diaminopimelate} \rightarrow \text{meso-diaminopimelate}$                                                                                                 | M                                |
| BRANCHED-CHAINAMINOTRANSFERVAL-RXN | Branched-chain amino acid aminotransferase                     | $\text{L-valine} + 2\text{-ketoglutarate} \leftarrow \text{L-glutamate} + 2\text{-keto-isovalerate}$                                                                 | T                                |
| DMK-RXN                            | NA                                                             | $\text{all-trans-octaprenyl diphosphate} + 1,4\text{-dihydroxy-2-naphthoate} \rightarrow \text{demethylmenaquinone-8} + \text{diphosphate} + \text{CO}_2$            | M                                |
| DAHPSYN-RXN                        | 2-dehydro-3-deoxy phosphoheptonate aldolase                    | $\text{H}_2\text{O} + \text{phosphoenolpyruvate} + \text{D-erythrose-4-phosphate} \rightarrow 3\text{-deoxy-D-arabino-heptulosonate-7-phosphate} + \text{phosphate}$ | M                                |
| 3-ISOPROPYLMALISOM-RXN             | 3-isopropylmalate dehydratase                                  | $\text{H}_2\text{O} + 2\text{-isopropylmalate} \rightarrow \text{isopropylmaleate} + \text{H}_2\text{O}$                                                             | M                                |

| Reaction BioCyc ID                       | Name                                          | Formula                                                                                                                                 | Evidence to assign the direction |
|------------------------------------------|-----------------------------------------------|-----------------------------------------------------------------------------------------------------------------------------------------|----------------------------------|
| SPONTPRO-RXN                             | NA                                            | <b>L-glutamate gamma-semialdehyde</b> → <b>pyrroline 5-carboxylate</b> + H <sub>2</sub> O                                               | T                                |
| ORNCARBAMTRANSFERR-RXN                   | Ornithine carbamoyl transferase               | <b>carbamoyl-phosphate</b> + <b>L-ornithine</b> → <b>citrulline</b> + phosphate                                                         | T                                |
| DIHYDROXYISOVALDEHYDRAT-RXN              | Dihydroxy-acid dehydratase                    | <b>2,3-dihydroxy-isovalerate</b> → <b>2-keto-isovalerate</b> + H <sub>2</sub> O                                                         | M                                |
| PREPHENATEDEHYDRAT-RXN                   | Prephenate dehydratase                        | <b>Prephenate</b> → <b>phenylpyruvate</b> + H <sub>2</sub> O + CO <sub>2</sub>                                                          | M                                |
| ARGSUCCINSYN-RXN                         | Arginino succinate synthetase                 | <b>citrulline</b> + ATP + <b>L-aspartate</b> → <b>L-arginino-succinate</b> + AMP + diphosphate                                          | M                                |
| 3-DEHYDROQUINATE-SYNTHASE-RXN            | 3-dehydroquinate synthase                     | <b>3-deoxy-D-arabino-heptulosonate-7-phosphate</b> → <b>3-dehydroquinate</b> + phosphate                                                | M                                |
| PRTRANS-RXN                              | Anthranilate phosphoribosyl transferase       | <b>anthranilate</b> + <b>5-phosphoribosyl 1-pyrophosphate</b> → <b>N-(5'-phosphoribosyl)-anthranilate</b> + diphosphate                 | M                                |
| DIHYDROPICRED-RXN                        | Dihydrodipicolinate reductase                 | NAD(P)H + <b>L-2,3-dihydrodipicolinate</b> → NAD(P) <sup>+</sup> + <b>tetrahydrodipicolinate</b>                                        | M                                |
| ASPARTATE-SEMIALDEHYDE-DEHYDROGENASE-RXN | Aspartate-semialdehyde dehydrogenase          | H <sup>+</sup> + NADPH + <b>L-aspartyl-4-phosphate</b> → <b>L-aspartate-semialdehyde</b> + NADP <sup>+</sup> + phosphate                | M                                |
| ANTHRANSYN-RXN                           | Anthranilate synthase                         | L-glutamine + <b>chorismate</b> → <b>anthranilate</b> + <b>pyruvate</b> + L-glutamate                                                   | M                                |
| DIAMINOPIMDECARB-RXN                     | Diaminopimelate decarboxylase                 | <b>Meso-diaminopimelate</b> → <b>L-lysine</b> + CO <sub>2</sub>                                                                         | M                                |
| RXN0-2382                                | NA                                            | <b>L-serine</b> + <b>indole</b> → <b>L-tryptophan</b> + H <sub>2</sub> O                                                                | M                                |
| PRPPSYN-RXN                              | ribose-phosphate diphosphokinase              | <b>D-ribose-5-phosphate</b> + ATP → <b>5-phosphoribosyl 1-pyrophosphate</b> + AMP                                                       | M                                |
| IGPSYN-RXN                               | indole-3-glycerol-phosphate synthase          | <b>1-(o-carboxyphenylamino)-1'-deoxyribulose-5'-phosphate</b> → <b>indole-3-glycerol-phosphate</b> + H <sub>2</sub> O + CO <sub>2</sub> | M                                |
| SUCCDIAMINOPIMDESUCC-RXN                 | Succinyl-diaminopimelate desuccinylase        | <b>N-succinyl-L,L-2,6-diaminopimelate</b> + H <sub>2</sub> O → <b>succinate</b> + <b>L,L-diaminopimelate</b>                            | M                                |
| 24654614619-RXN                          | 3-phosphoshikimate 1-carboxy vinyltransferase | <b>phosphoenolpyruvate</b> + <b>shikimate-3-phosphate</b> → <b>5-enolpyruvyl-shikimate-3-phosphate</b> + phosphate                      | M                                |
| BRANCHED-CHAINAMINOTRANSFER-RLEU-RXN     | Branched-chain amino acid aminotransferase    | 2-ketoglutarate + <b>L-leucine</b> ← L-glutamate + <b>2-ketoisocaproate</b>                                                             | T                                |
| BRANCHED-CHAINAMINOTRANSFER-RILEU-RXN    | Branched-chain amino acid aminotransferase    | 2-ketoglutarate + <b>L-isoleucine</b> ← L-glutamate + <b>2-keto-3-methyl-valerate</b>                                                   | T                                |

| <b>Reaction BioCyc ID</b>   | <b>Name</b>                                                | <b>Formula</b>                                                                                              | <b>Evidence to assign the direction</b> |
|-----------------------------|------------------------------------------------------------|-------------------------------------------------------------------------------------------------------------|-----------------------------------------|
| DIHYDRODIPICSYN-RXN         | Dihydro dipicolinate synthase                              | <b>pyruvate + L-aspartate-semialdehyde → L-2,3-dihydrodipicolinate + H2O</b>                                | M                                       |
| DIHYDROXYMETVALDEHYDRAT-RXN | Dihydroxy-acid dehydratase                                 | <b>2,3-dihydroxy-3-methylvalerate → 2-keto-3-methylvalerate + H2O</b>                                       | M                                       |
| THREDEHYD-RXN               | Threonine dehydratase                                      | <b>L-threonine → ammonia + 2-oxobutanoate</b>                                                               | M                                       |
| SHIKIMATE-KINASE-RXN        | shikimate-kinase                                           | ATP + <b>shikimate</b> → ADP + <b>shikimate-3-phosphate</b>                                                 | M                                       |
| ARGSUCCINLYA-RXN            | Arginino succinate lyase                                   | <b>L-arginino-succinate → L-arginine + fumarate</b>                                                         | M                                       |
| GAPOXNPHOSPHN-RXN           | Glyceraldehyde 3-phosphate dehydrogenase (phosphorylating) | NAD <sup>+</sup> + <b>D-glyceraldehyde-3-phosphate</b> + phosphate → NADH + <b>1,3-diphosphateglycerate</b> | T                                       |
| ACETOOHBUTSYN-RXN           | Acetolactate synthase                                      | <b>pyruvate + 2-oxobutanoate → 2-aceto-2-hydroxybutyrate + CO2</b>                                          | M                                       |
| PYRROLINECARBDEHYDROG-RXN   | 1-pyrroline-5-carboxylate dehydrogenase                    | <b>pyrroline 5-carboxylate + NAD<sup>+</sup> + H2O → NADH + L-glutamate</b>                                 | M                                       |
| RXN-7933                    | NA                                                         | <b>N-acetyl-L-citrulline + H2O → acetate + citrulline</b>                                                   | M                                       |
| ACETYLORNDEACET-RXN         | Acetylmithine deacetylase                                  | <b>N-acetyl-L-ornithine + H2O → acetate + L-ornithine</b>                                                   | M                                       |
