# Supplementary material for: Graph-Based Analysis of the Metabolic Exchanges between Two Co-Resident Intracellular Symbionts, Baumannia cicadellinicola and Sulcia muelleri, with Their Insect Host, Homalodisca coagulata
Source: PubMed Central journal article supplement (PMC2936742; doi:10.1371/journal.pcbi.1000904), 2010-09-02
Supplement: pcbi.1000904.s028.pdf [file pcbi.1000904.s028.pdf]

**Table S4.** List of reactions in the metabolic network we build for *B. cicadellinicola* and the evidences used to assign the direction of the reactions. The metabolites kept in the reactions after filtering appear in bold. **M**: MetaCyc pathways evidence; **T**: topological evidence

| Reaction BioCyc ID               | Name                                                                      | Formula                                                                                                                                                             | Evidence to assign the direction |
|----------------------------------|---------------------------------------------------------------------------|---------------------------------------------------------------------------------------------------------------------------------------------------------------------|----------------------------------|
| RXNI-3                           | NA                                                                        | menaquinone-8 + <b>malate</b> → menaquinol + <b>oxaloacetate</b>                                                                                                    | M                                |
| 6PGLUCONOLACT-RXN                | 6-phospho gluconolactonase                                                | H <sub>2</sub> O + <b>D-glucono-delta-lactone-6-phosphate</b> → <b>6-phospho-D-gluconate</b>                                                                        | M                                |
| DEPHOSPHOCOAKIN-RXN              | Dephospho-CoA kinase                                                      | <b>dephospho-CoA</b> + ATP → ADP + <b>coenzyme A</b>                                                                                                                | M                                |
| PGLUCISOM-RXN                    | Glucose-6-phosphate isomerase                                             | <b>beta-D-glucose-6-phosphate</b> → <b>fructose-6-phosphate</b>                                                                                                     | T                                |
| DIHYDROFOLATESYNT H-RXN          | dihydrofolate synthetase                                                  | <b>7,8-dihydropteroate</b> + <b>L-glutamate</b> + ATP → ADP + phosphate + <b>7,8-dihydrofolate</b>                                                                  | M                                |
| HOMOCYSMET-RXN                   | 5-methyl tetrahydropteroyl triglutamate--homocysteine S-methyltransferase | <b>L-homocysteine</b> + 5-methyltetrahydropteroyltri-L-glutamate → <b>L-methionine</b> + tetrahydropteroyltri-L-glutamate                                           | M                                |
| THI-P-SYN-RXN                    | Thiamine-phosphate pyrophosphorylase                                      | <b>4-amino-5-hydroxymethyl-2-methylpyrimidine-pyrophosphate</b> + <b>4-methyl-5-(beta-hydroxyethyl)thiazole phosphate</b> → diphosphate + <b>thiamine-phosphate</b> | M                                |
| F16ALDOLASE-RXN                  | Fructose-bisphosphate aldolase                                            | <b>fructose-1,6-bisphosphate</b> → <b>dihydroxy-acetone phosphate</b> + <b>D-glyceraldehyde-3-phosphate</b>                                                         | T                                |
| UDPREDUCT-RXN                    | NA                                                                        | <b>UDP</b> + a reduced thioredoxin → H <sub>2</sub> O + <b>dUDP</b> + an oxidized thioredoxin                                                                       | M                                |
| METHYLENETHFDEHYDROG-NADP-RXN    | Methylene tetrahydrofolate dehydrogenase (NADP+)                          | <b>5,10-methylene-THF</b> + NADP <sup>+</sup> ↔ <b>5,10-methenyltetrahydrofolate</b> + NADPH                                                                        |                                  |
| GMP-SYN-NH3-RXN                  | GMP synthetase                                                            | ammonia + <b>xanthosine-5-phosphate</b> + ATP → <b>GMP</b> + diphosphate + AMP                                                                                      | M                                |
| RIBULP3EPIM-RXN                  | ribulose phosphate 3-epimerase                                            | <b>D-ribulose-5-phosphate</b> → <b>D-xylulose-5-phosphate</b>                                                                                                       | T                                |
| P-PANTOCYSLIG-RXN                | Phospho pantothenate--cysteine ligase                                     | <b>D-4'-phosphopantothenate</b> + <b>L-cysteine</b> + CTP → diphosphate + <b>R-4'-phosphopantothenoyl-L-cysteine</b> + CMP                                          | M                                |
| GLUTRACE-RXN                     | Glutamate racemase                                                        | <b>L-glutamate</b> → <b>D-glutamate</b>                                                                                                                             | M                                |
| RIBOFLAVINKIN-RXN                | Riboflavin kinase                                                         | ATP + <b>riboflavin</b> → <b>FMN</b> + ADP                                                                                                                          | M                                |
| 3-DEHYDROQUINATE-DEHYDRATASE-RXN | 3-dehydroquinate dehydratase                                              | <b>3-dehydroquinate</b> → H <sub>2</sub> O + <b>3-dehydro-shikimate</b>                                                                                             | M                                |
| SIROHEME-FERROCHELAT-RXN         | Sirohydrochlorin ferrochelatase                                           | <b>sirohydrochlorin</b> + Fe <sup>2+</sup> → H <sup>+</sup> + <b>siroheme</b>                                                                                       | M                                |

| Reaction BioCyc ID            | Name                                                               | Formula                                                                                                                                                       | Evidence to assign the direction |
|-------------------------------|--------------------------------------------------------------------|---------------------------------------------------------------------------------------------------------------------------------------------------------------|----------------------------------|
| 1.5.1.20-RXN                  | Methylene tetrahydrofolate reductase (NADPH)                       | $H^+ + 5,10\text{-methylene-THF} + NAD(P)H \rightarrow NAD(P)^+ + 5\text{-methyl-THF}$                                                                        | M                                |
| DIHYDROOROTOX-RXN             | Dihydroorotate oxidase                                             | <b>dihydroorotate</b> + oxygen $\rightarrow$ H <sub>2</sub> O <sub>2</sub> + <b>orotate</b>                                                                   | T                                |
| CHORISMATE-SYNTHASE-RXN       | Chorismate synthase                                                | <b>5-enolpyruvyl-shikimate-3-phosphate</b> $\rightarrow$ phosphate + <b>chorismate</b>                                                                        | M                                |
| PHOSACETYLTRANS-RXN           | Phosphate acetyltransferase                                        | phosphate + <b>acetyl-CoA</b> $\leftrightarrow$ coenzyme A + <b>acetylphosphate</b>                                                                           |                                  |
| CDPREDUCT-RXN                 | NA                                                                 | a reduced thioredoxin + <b>CDP</b> $\rightarrow$ H <sub>2</sub> O + <b>dCDP</b> + an oxidized thioredoxin                                                     | M                                |
| PANTEPADENYLYLTRAN-RXN        | Pantetheine-phosphate adenylyl transferase                         | <b>pantetheine 4'-phosphate</b> + ATP $\rightarrow$ <b>dephospho-CoA</b> + diphosphate                                                                        | M                                |
| RXN-8972TER                   | UDP-N-acetylmuramoylalanyl-D-glutamate--2,6-diaminopimelate ligase | <b>UDP-N-acetylmuramoyl-L-alanyl-D-glutamate</b> + <b>meso-diaminopimelate</b> + ATP $\rightarrow$ a <b>UDP-N-acetylmuramoyl-tripeptide</b> + ADP + phosphate | M                                |
| 7KAPSYN-RXN                   | 8-amino-7-oxononanoate synthase                                    | <b>L-alanine</b> + pimeloyl-CoA $\rightarrow$ <b>7-keto-8-aminopelargonate</b> + coenzyme A + CO <sub>2</sub>                                                 | M                                |
| H2PTEROATESYNTH-RXN           | Dihydropteroate synthase                                           | <b>(2-amino-4-hydroxy-7,8-dihydropteridin-6-yl)methyl diphosphate</b> + <b>p-aminobenzoate</b> $\rightarrow$ diphosphate + <b>7,8-dihydropteroate</b>         | M                                |
| GPPSYN-RXN                    | Dimethyl allyltransferase                                          | <b>dimethylallyl-diphosphate</b> + <b>isopentenyl diphosphate</b> $\rightarrow$ <b>geranyl-diphosphate</b> + diphosphate                                      | M                                |
| 5-FORMYL-THF-CYCLO-LIGASE-RXN | 5-formyl tetrahydrofolate cyclo-ligase                             | <b>5-formyl-tetrahydrofolate</b> + ATP $\leftrightarrow$ <b>5,10-methenyltetrahydrofolate</b> + ADP + phosphate                                               |                                  |
| POLY-RXN                      | polymerisation                                                     | a <b>UDP-N-acetylmuramoyl-pentapeptide</b> $\rightarrow$ <b>UDP-N-acetylmuramoyl-L-alanyl-D-glutamyl-meso-2,6-diaminoheptanedioate- D-alanyl-D-alanine</b>    | M                                |
| TRANSALDOL-RXN                | Transaldolase                                                      | <b>D-sedoheptulose-7-phosphate</b> + <b>D-glyceraldehyde-3-phosphate</b> $\rightarrow$ <b>D-erythrose-4-phosphate</b> + <b>fructose-6-phosphate</b>           | T                                |
| QUINOLINATE-SYNTHA-RXN        | NA                                                                 | <b>dihydroxy-acetone phosphate</b> + <b>iminoaspartate</b> $\rightarrow$ H <sub>2</sub> O + phosphate + <b>quinolinate</b>                                    | M                                |
| RXN-6102                      | NA                                                                 | <b>L-glutamate</b> + <b>tetrahydrofolate</b> + ATP $\rightarrow$ <b>tetrahydrofolate-L-glutamate</b> + ADP + phosphate                                        | M                                |
| PABSYNMULTI-RXN               | synthesis of p-aminobenzoic acid                                   | L-glutamine + <b>chorismate</b> $\rightarrow$ <b>pyruvate</b> + L-glutamate + <b>p-aminobenzoate</b> + H <sup>+</sup>                                         | T                                |
| TRIOSEPIISOMERIZATIO-RXN      | Triosephosphate isomerase                                          | <b>D-glyceraldehyde-3-phosphate</b> $\leftrightarrow$ <b>dihydroxy-acetone phosphate</b>                                                                      | T                                |

| Reaction BioCyc ID         | Name                                                         | Formula                                                                                                                                                                                                                                        | Evidence to assign the direction |
|----------------------------|--------------------------------------------------------------|------------------------------------------------------------------------------------------------------------------------------------------------------------------------------------------------------------------------------------------------|----------------------------------|
| SAICARSYN-RXN              | Phosphoribosyl aminoimidazole-succino carboxamide synthetase | <b>4-carboxyaminoimidazole ribonucleotide + ATP + L-aspartate</b> → ADP + phosphate + 5'- <b>phosphoribosyl-4-(N-succinocarboxamide)-5-aminoimidazole</b>                                                                                      | M                                |
| RXN0-302                   | 2-C-methyl-D-erythritol 2,4-cyclodiphosphate synthase        | <b>2-phospho-4-(cytidine 5'-diphospho)-2-C-methyl-D-erythritol</b> → 2-C-methyl-D-erythritol-2,4-cyclodiphosphate + CMP                                                                                                                        | M                                |
| ATPPHOSPHORIBOSYLTRANS-RXN | ATP phosphoribosyl transferase                               | <b>5-phosphoribosyl 1-pyrophosphate + ATP</b> → <b>phosphoribosyl-ATP + diphosphate</b>                                                                                                                                                        | M                                |
| PSERTRANSAMPYR-RXN         | NA                                                           | <b>2-oxo-3-hydroxy-4-phosphobutanoate + L-glutamate</b> → <b>4-(phosphonoxy)-threonine + 2-ketoglutarate</b>                                                                                                                                   | M                                |
| FADSYN-RXN                 | FMN adenylyl transferase                                     | <b>FMN + ATP</b> → diphosphate + <b>FAD</b>                                                                                                                                                                                                    | M                                |
| H2NEOPTERINALDOL-RXN       | Dihydroneopterin aldolase                                    | <b>7,8-dihydro-D-neopterin</b> → <b>6-hydroxymethyl-7,8-dihydropterin + glycolaldehyde</b>                                                                                                                                                     | M                                |
| PRPPAMIDOTRANS-RXN         | Amido phosphoribosyl transferase                             | L-glutamine + H <sub>2</sub> O + <b>5-phosphoribosyl 1-pyrophosphate</b> → diphosphate + L-glutamate + <b>5-phospho-beta-D-ribosyl-amine</b>                                                                                                   | M                                |
| 4.2.3.12-RXN               | 6-pyruvoyl tetrahydropterin synthase                         | <b>7,8-dihydroneopterin triphosphate</b> → PPPi + <b>6-pyruvoyl tetrahydropterin</b>                                                                                                                                                           | M                                |
| PEPDEPHOS-RXN              | Pyruvate kinase                                              | ADP + <b>phosphoenolpyruvate</b> → <b>pyruvate + ATP</b>                                                                                                                                                                                       | M                                |
| DIMETHUROPORDEHYDROG-RXN   | NA                                                           | NAD <sup>+</sup> + <b>precorrin-2</b> → <b>sirohydrochlorin + NADH</b>                                                                                                                                                                         | M                                |
| OROTPDECARB-RXN            | Orotidine-5'-phosphate decarboxylase                         | <b>orotidine-5'-phosphate</b> → <b>UMP + CO<sub>2</sub></b>                                                                                                                                                                                    | M                                |
| GDPKIN-RXN                 | NA                                                           | <b>GDP + ATP</b> → ADP + <b>GTP</b>                                                                                                                                                                                                            | M                                |
| AICARSYN-RXN               | Adenylosuccinate lyase                                       | <b>5'-phosphoribosyl-4-(N-succinocarboxamide)-5-aminoimidazole</b> → <b>fumarate + aminoimidazole carboxamide ribonucleotide</b>                                                                                                               | M                                |
| DIHYDROOROT-RXN            | Dihydroorotase                                               | <b>N-carbamoyl-L-aspartate</b> → <b>dihydroorotate + H<sub>2</sub>O</b>                                                                                                                                                                        | M                                |
| PHOSNACMURPENTATRANS-RXN   | Phospho-N-acetylmuramoyl-pentapeptide-transferase            | <b>undecaprenyl phosphate + UDP-N-acetylmuramoyl-L-alanyl-D-glutamyl-meso-2,6-diaminoheptanedioate-D-alanyl-D-alanine</b> → <b>UMP + N-acetylmuramoyl-L-alanyl-D-glutamyl-meso-2,6-diaminoheptane-D-alanyl-D-alanine-diphosphoundecaprenol</b> | T                                |
| IMPCYCLOHYDROLASE-RXN      | IMP cyclohydrolase                                           | <b>phosphoribosyl-formamido-carboxamide</b> → <b>inosine-5'-phosphate + H<sub>2</sub>O</b>                                                                                                                                                     | M                                |
| GLU6PDEHYDROG-RXN          | Glucose-6-phosphate 1-dehydrogenase                          | <b>beta-D-glucose-6-phosphate + NADP<sup>+</sup></b> → H <sup>+</sup> + NADPH + <b>D-glucono-&amp;delta;-lactone-6-phosphate</b>                                                                                                               | M                                |
| UDPKIN-RXN                 | NA                                                           | <b>UDP + ATP</b> → ADP + <b>UTP</b>                                                                                                                                                                                                            | M                                |

| Reaction BioCyc ID            | Name                                                                    | Formula                                                                                                                                                               | Evidence to assign the direction |
|-------------------------------|-------------------------------------------------------------------------|-----------------------------------------------------------------------------------------------------------------------------------------------------------------------|----------------------------------|
| PABASYN-RXN                   | Amino deoxychorismate synthase                                          | L-glutamine + <b>chorismate</b> → <b>4-amino-4-deoxychorismate</b> + L-glutamate                                                                                      | M                                |
| P-PANTOCYSDECARB-RXN          | Phospho pantothenoyl cysteine decarboxylase                             | <b>R-4'-phosphopantothenoyl-L-cysteine</b> → <b>panetheine 4'-phosphate</b> + CO <sub>2</sub>                                                                         | M                                |
| UMPKI-RXN                     | NA                                                                      | <b>UMP</b> + ATP → <b>UDP</b> + ADP                                                                                                                                   | M                                |
| H2PTERIDINEPYROPHOSPHOKIN-RXN | 2-amino-4-hydroxy-6-hydroxy methyl dihydro pteridine pyrophospho kinase | <b>6-hydroxymethyl-7,8-dihydropterin</b> + ATP → <b>(2-amino-4-hydroxy-7,8-dihydropteridin-6-yl)methyl diphosphate</b> + AMP                                          | M                                |
| S-ADENMETSYN-RXN              | Methionine adenosyl transferase                                         | H <sub>2</sub> O + <b>L-methionine</b> + ATP → diphosphate + phosphate + <b>S-adenosyl-L-methionine</b>                                                               | M                                |
| 2-DEHYDROPANTOATE-REDUCT-RXN  | 2-dehydropantoate 2-reductase                                           | <b>2-dehydropantoate</b> + NADPH → <b>L-pantoate</b> + NADP <sup>+</sup>                                                                                              | M                                |
| HISTALDEHYD-RXN               | Histidinol dehydrogenase                                                | H <sub>2</sub> O + NAD <sup>+</sup> + <b>histidinal</b> → NADH + <b>L-histidine</b>                                                                                   | M                                |
| GLUTATHIONE-SYN-RXN           | glutathione synthetase                                                  | <b>L-γ-glutamylcysteine</b> + ATP + <b>glycine</b> → ADP + phosphate + <b>glutathione</b>                                                                             | M                                |
| FGAMSYN-RXN                   | Phosphoribosyl formyl glycinamide synthetase                            | L-glutamine + H <sub>2</sub> O + <b>5'-phosphoribosyl-N-formylglycineamide</b> + ATP → <b>5-phosphoribosyl-N-formylglycineamidine</b> + ADP + phosphate + L-glutamate | M                                |
| NAD-SYNTH-NH3-RXN             | NAD(+) synthetase                                                       | ammonia + <b>deamido-NAD</b> + ATP → diphosphate + <b>NAD<sup>+</sup></b> + AMP                                                                                       | M                                |
| GTP-CYCLOHYDRO-II-RXN         | GTP cyclohydrolase II                                                   | H <sub>2</sub> O + <b>GTP</b> → <b>formate</b> + diphosphate + <b>2,5-diamino-6-(ribosylamino)-4-(3H)-pyrimidinone 5'-phosphate</b>                                   | M                                |
| UDP-NACMURALA-GLU-LIG-RXN     | UDP-N-acetylmuramoylalanine--D-glutamate ligase                         | <b>D-glutamate</b> + ATP + <b>UDP-N-acetylmuramoyl-L-alanine</b> → ADP + phosphate + <b>UDP-N-acetylmuramoyl-L-alanyl-D-glutamate</b>                                 | M                                |
| PHOSPHASERDECARB-RXN          | Phosphatidyl serine decarboxylase                                       | <b>an L-1-phosphatidylserine</b> → <b>an L-1-phosphatidylethanolamine</b> + CO <sub>2</sub>                                                                           | M                                |
| THYMIDYLATESYN-RXN            | Thymidylate synthase                                                    | 5,10-methylene-THF + <b>dUMP</b> → <b>dTMP</b> + 7,8-dihydrofolate                                                                                                    | T                                |
| L-ASPARTATE-OXID-RXN          | NA                                                                      | oxygen + <b>L-aspartate</b> → <b>H<sub>2</sub>O<sub>2</sub></b> + <b>iminoaspartate</b>                                                                               | M                                |
| DTDPKIN-RXN                   | NA                                                                      | ATP + <b>dTDP</b> → <b>dTTP</b> + ADP                                                                                                                                 | M                                |

| Reaction BioCyc ID                    | Name                                         | Formula                                                                                                                                                                 | Evidence to assign the direction |
|---------------------------------------|----------------------------------------------|-------------------------------------------------------------------------------------------------------------------------------------------------------------------------|----------------------------------|
| 1.1.1.262-RXN                         | 4-hydroxythreonine-4-phosphate dehydrogenase | <b>4-(phosphonoxy)-threonine</b> + NAD <sup>+</sup> → NADH + <b>(2S)-2-amino-3-oxo-4-phosphonoxybutanoate</b>                                                           | M                                |
| PGPPHOSPHA-RXN                        | Phosphatidylglycero phosphatase              | H <sub>2</sub> O + <b>an L-1-phosphatidylglycerol-phosphate</b> → phosphate + <b>an L-1-phosphatidyl-glycerol</b>                                                       | M                                |
| ASPARTASE-RXN                         | Aspartate ammonia-lyase                      | <b>L-aspartate</b> → ammonia + <b>fumarate</b>                                                                                                                          | M                                |
| PDXJ-RXN                              | NA                                           | <b>1-amino-propan-2-one-3-phosphate</b> + <b>1-deoxy-D-xylulose 5-phosphate</b> → <b>pyridoxine-5'-phosphate</b> + H <sub>2</sub> O + phosphate                         | M                                |
| CARDIOLIPSYN-RXN                      | NA                                           | <b>an L-1-phosphatidyl-glycerol</b> → <b>glycerol</b> + <b>cardiolipin</b>                                                                                              | M                                |
| 3-DEHYDROQUINATE-SYNTHASE-RXN         | 3-dehydroquinate synthase                    | <b>3-deoxy-D-arabino-heptulosonate-7-phosphate</b> → phosphate + <b>3-dehydroquinate</b>                                                                                | M                                |
| GLUTAMIDOTRANS-RXN                    | NA                                           | L-glutamine + <b>phosphoribulosylformimino-AICAR-P</b> → <b>D-erythro-imidazole-glycerol-phosphate</b> + L-glutamate + <b>aminoimidazole carboxamide ribonucleotide</b> | M                                |
| RIBOFLAVIN-SYN-RXN                    | Riboflavin synthase                          | <b>6,7-dimethyl-8-(1-D-ribityl)lumazine</b> → <b>riboflavin</b> + <b>5-amino-6-ribitylamino-2,4(1H,3H)-pyrimidinedione</b>                                              | M                                |
| DUDPKIN-RXN                           | NA                                           | <b>dUDP</b> + ATP → <b>dUTP</b> + ADP                                                                                                                                   | M                                |
| RXN-8447                              | NA                                           | H <sup>+</sup> + <b>(2S)-2-amino-3-oxo-4-phosphonoxybutanoate</b> → <b>1-amino-propan-2-one-3-phosphate</b> + CO <sub>2</sub>                                           | M                                |
| NAG1P-URIDYLTRANS-RXN                 | UDP-N-acetylglucosamine pyrophosphorylase    | <b>N-acetyl-glucosamine-1-phosphate</b> + UTP → diphosphate + <b>UDP-N-acetyl-D-glucosamine</b>                                                                         | M                                |
| RXN0-2921                             | NA                                           | <b>L-glutamate</b> + ATP + <b>a 5,10-methylene-tetrahydrofolate</b> → ADP + phosphate + <b>a 5,10-methylene-tetrahydrofolate</b>                                        | M                                |
| ADENOSYLHOMOCYSTEINE-NUCLEOSIDASE-RXN | Adenosyl homocysteine nucleosidase           | <b>S-adenosyl-L-homocysteine</b> + H <sub>2</sub> O → <b>S-ribosyl-L-homocysteine</b> + <b>adenine</b>                                                                  | T                                |
| ACETATEKIN-RXN                        | Acetate kinase                               | <b>acetate</b> + ATP ↔ ADP + <b>acetylphosphate</b>                                                                                                                     |                                  |
| ERYTH4PDEHYDROG-RXN                   | Erythrose-4-phosphate dehydrogenase          | H <sub>2</sub> O + NAD <sup>+</sup> + <b>D-erythrose-4-phosphate</b> → H <sup>+</sup> + NADH + <b>erythronate-4-phosphate</b>                                           | M                                |
| THI-P-KIN-RXN                         | Thiamine-phosphate kinase                    | ATP + <b>thiamine-phosphate</b> → ADP + <b>thiamine diphosphate</b>                                                                                                     | M                                |
| DTMPKI-RXN                            | Thymidylate kinase                           | <b>dTMP</b> + ATP → ADP + <b>dTDP</b>                                                                                                                                   | M                                |
| 5.4.2.10-RXN                          | Phosphoglucosamine mutase                    | <b>D-glucosamine-6-phosphate</b> → <b>D-glucosamine 1-phosphate</b>                                                                                                     | M                                |

| Reaction BioCyc ID                 | Name                                                                                 | Formula                                                                                                                                                                                                                                                                            | Evidence to assign the direction |
|------------------------------------|--------------------------------------------------------------------------------------|------------------------------------------------------------------------------------------------------------------------------------------------------------------------------------------------------------------------------------------------------------------------------------|----------------------------------|
| RXN0-5180                          | NA                                                                                   | <b>isopentenyl diphosphate + (E,E)-farnesyl diphosphate → diphosphate + 2-cis,6-trans,10-trans-geranylgeranyl diphosphate</b>                                                                                                                                                      | M                                |
| ASPCARBTRANS-RXN                   | Aspartate carbamoyl transferase                                                      | <b>carbamoyl-phosphate + L-aspartate → phosphate + N-carbamoyl-L-aspartate</b>                                                                                                                                                                                                     | M                                |
| L-ASPARTATE-OXIDASE-RXN            | L-aspartate oxidase                                                                  | H <sub>2</sub> O + oxygen + <b>L-aspartate</b> → H <sub>2</sub> O <sub>2</sub> + ammonia + <b>iminoaspartate</b>                                                                                                                                                                   | T                                |
| ERYTHRON4PDEHYDROG-RXN             | NA                                                                                   | NAD <sup>+</sup> + <b>erythronate-4-phosphate</b> → <b>2-oxo-3-hydroxy-4-phosphobutanoate</b> + NADH                                                                                                                                                                               | M                                |
| GARTRANSFORMYL2-RXN                | NA                                                                                   | <b>formate + 5-phospho-ribosyl-glycineamide</b> + ATP → <b>5'-phosphoribosyl-N-formylglycineamide</b> + ADP + phosphate                                                                                                                                                            | M                                |
| HISTAMINOTRANS-RXN                 | Histidinol-phosphate aminotransferase                                                | <b>imidazole acetol-phosphate</b> + L-glutamate → <b>L-histidinol-phosphate</b> + 2-ketoglutarate                                                                                                                                                                                  | M                                |
| AIRCARBOXY-RXN                     | Phosphoribosyl aminoimidazole carboxylase                                            | <b>5-aminoimidazole ribonucleotide</b> + CO <sub>2</sub> → <b>4-carboxyaminoimidazole ribonucleotide</b>                                                                                                                                                                           | M                                |
| DALADALALIG-RXN                    | D-alanine--D-alanine ligase                                                          | <b>D-alanine</b> + ATP → ADP + <b>D-alanyl-D-alanine</b> + phosphate                                                                                                                                                                                                               | M                                |
| UDPNACETYLGLUCOSAMENOLPYRTRANS-RXN | UDP-N-acetyl glucosamine 1-carboxyvinyl transferase                                  | <b>phosphoenolpyruvate + UDP-N-acetyl-D-glucosamine</b> → <b>UDP-GlcNAc-enolpyruvate</b> + phosphate                                                                                                                                                                               | M                                |
| ADENYL-KIN-RXN                     | Adenylate kinase                                                                     | <b>ATP + AMP → ADP</b>                                                                                                                                                                                                                                                             | M                                |
| CARBPSYN-RXN                       | carbamoyl-phosphate synthetase (glutamine-hydrolysing)                               | L-glutamine + H <sub>2</sub> O + <b>HCO<sub>3</sub><sup>-</sup></b> + ATP → <b>carbamoyl-phosphate</b> + ADP + phosphate + L-glutamate                                                                                                                                             | M                                |
| NACGLCTRANS-RXN                    | Undecaprenyl diphospho-muramoyl pentapeptide beta-N- acetyl glucosaminyl transferase | <b>N-acetylmuramoyl-L-alanyl-D-glutamyl-meso-2,6-diaminoheptane-D-alanyl-D-alanine-diphosphoundecaprenol</b> + UDP-N-acetyl-D-glucosamine → UDP + <b>N-acetylmuramoyl-L-alanyl-D-glutamyl-meso-2,6-diaminoheptane-D-alanyl-D-alanine-diphosphoundecaprenyl-N-acetylglucosamine</b> | M                                |
| L-GLN-FRUCT-6-P-AMINOTRANS-RXN     | Glucosamine--fructose-6-phosphate aminotransferase (isomerizing)                     | L-glutamine + <b>fructose-6-phosphate</b> → <b>D-glucosamine-6-phosphate</b> + L-glutamate                                                                                                                                                                                         | M                                |
| DXS-RXN                            | NA                                                                                   | <b>pyruvate + D-glyceraldehyde-3-phosphate</b> → <b>1-deoxy-D-xylulose 5-phosphate</b> + CO <sub>2</sub>                                                                                                                                                                           | M                                |
| HEMEOSYN-RXN                       | heme o biosynthesis                                                                  | H <sub>2</sub> O + <b>protoheme IX</b> + (E,E)-farnesyl diphosphate → diphosphate + <b>heme o</b>                                                                                                                                                                                  | T                                |
| GLYOHMETRANS-RXN                   | glycine hydroxy methyltransferase                                                    | <b>L-serine</b> + tetrahydrofolate ↔ H <sub>2</sub> O + 5,10-methylene-THF + <b>glycine</b>                                                                                                                                                                                        |                                  |

| Reaction BioCyc ID      | Name                                                      | Formula                                                                                                                                                                                                             | Evidence to assign the direction |
|-------------------------|-----------------------------------------------------------|---------------------------------------------------------------------------------------------------------------------------------------------------------------------------------------------------------------------|----------------------------------|
| GLUTCYSLIG-RXN          | Glutamate--cysteine ligase                                | <b>L-glutamate + L-cysteine + ATP → ADP + L-<math>\gamma</math>-glutamylcysteine + phosphate</b>                                                                                                                    | M                                |
| METBALT-RXN             | NA                                                        | ammonia + <b>succinate + 2-oxobutanoate ← O-succinyl-L-homoserine + H2O</b>                                                                                                                                         | T                                |
| RXN-8675                | Uroporphyrinogen-III C-methyltransferase                  | <b>precorrin-1 + S-adenosyl-L-methionine → S-adenosyl-L-homocysteine + precorrin-2</b>                                                                                                                              | M                                |
| AMPSYN-RXN              | Adenylosuccinate lyase                                    | <b>adenylo-succinate → fumarate + AMP</b>                                                                                                                                                                           | M                                |
| UROGENIIISYN-RXN        | uroporphyrinogen-III synthase                             | <b>hydroxymethylbilane → H2O + uroporphyrinogen-III</b>                                                                                                                                                             | M                                |
| ADCLY-RXN               | Amino deoxychorismate lyase                               | <b>4-amino-4-deoxychorismate → pyruvate + p-aminobenzoate</b>                                                                                                                                                       | M                                |
| GTP-CYCLOHYDRO-I-RXN    | GTP cyclohydrolase I                                      | <b>H2O + GTP → formate + 7,8-dihydroneopterin triphosphate</b>                                                                                                                                                      | M                                |
| DIHYDROFOLATEREDUCT-RXN | Dihydrofolate reductase                                   | <b>NADPH + 7,8-dihydrofolate → tetrahydrofolate + NADP+</b>                                                                                                                                                         | M                                |
| 2.7.7.60-RXN            | 2-C-methyl-D-erythritol 4-phosphate cytidylyl transferase | <b>2-C-methyl-D-erythritol-4-phosphate + CTP → 4-(cytidine 5'-diphospho)-2-C-methyl-D-erythritol + diphosphate</b>                                                                                                  | M                                |
| HOMSUCTRAN-RXN          | Homoserine O-succinyl transferase                         | <b>homoserine + succinyl-CoA → O-succinyl-L-homoserine + coenzyme A</b>                                                                                                                                             | M                                |
| DCTP-DEAM-RXN           | dCTP deaminase                                            | <b>H2O + dCTP → ammonia + dUTP</b>                                                                                                                                                                                  | M                                |
| PYRIMSYN3-RXN           | Phosphomethylpyrimidine kinase                            | <b>hydroxymethylpyrimidine phosphate + ATP → ADP + 4-amino-5-hydroxymethyl-2-methylpyrimidine-pyrophosphate</b>                                                                                                     | M                                |
| RXN-1381                | NA                                                        | <b>sn-glycerol-3-phosphate + a fatty acyl CoA → coenzyme A + a 2-lysophosphatidate</b>                                                                                                                              | M                                |
| PEPCARBOXYKIN-RXN       | Phosphoenolpyruvate carboxykinase (ATP)                   | <b>oxaloacetate + ATP → ADP + phosphoenolpyruvate + CO2</b>                                                                                                                                                         | M                                |
| RIBOFLAVINSYNDEAM-RXN   | NA                                                        | <b>H2O + 2,5-diamino-6-(ribosylamino)-4-(3H)-pyrimidinone 5'-phosphate → ammonia + 5-amino-6-(5'-phosphoribosylamino)uracil</b>                                                                                     | M                                |
| RXN-1623                | NA                                                        | <b>a 2-lysophosphatidate + a fatty acyl CoA → coenzyme A + an L-phosphatidate</b>                                                                                                                                   | M                                |
| THIAZOLSYN2-RXN         | NA                                                        | <b>L-tyrosine + a ThiS-ThiF acyl-disulfide + 1-deoxy-D-xylulose 5-phosphate → a ThiS sulfur-carrier protein + 4-hydroxybenzyl alcohol + a ThiF protein + CO2 + 4-methyl-5-(beta-hydroxyethyl)thiazole phosphate</b> | M                                |
| DUTP-PYROP-RXN          | dUTP pyrophosphatase                                      | <b>dUTP + H2O → diphosphate + dUMP</b>                                                                                                                                                                              | M                                |

| Reaction BioCyc ID              | Name                                                        | Formula                                                                                                                                                       | Evidence to assign the direction |
|---------------------------------|-------------------------------------------------------------|---------------------------------------------------------------------------------------------------------------------------------------------------------------|----------------------------------|
| ACETYL-COA-CARBOXYLTRANSFER-RXN | Acetyl-CoA carboxylase                                      | $H^+ + HCO_3^- + \text{acetyl-CoA} + ATP \rightarrow \text{malonyl-CoA} + ADP + \text{phosphate}$                                                             | M                                |
| DCDPKIN-RXN                     | NA                                                          | $dCDP + ATP \rightarrow ADP + dCTP$                                                                                                                           | M                                |
| RXN-5985                        | NA                                                          | $9\text{-mercaptodethiobiotin} \rightarrow \text{biotin}$                                                                                                     | M                                |
| RXN-5984                        | NA                                                          | a sulfurated sulfur donor + <b>dethiobiotin</b> + a sulfur donor $\rightarrow$ <b>9-mercaptodethiobiotin</b> + an unsulfurated sulfur acceptor                | M                                |
| DAHPSYN-RXN                     | 2-dehydro-3-deoxyphosphoheptonate aldolase                  | $H_2O + \text{phosphoenolpyruvate} + \text{D-erythrose-4-phosphate} \rightarrow \text{3-deoxy-D-arabino-heptulosonate-7-phosphate} + \text{phosphate}$        | M                                |
| ADENYLOSUCCINATE-SYNTHASE-RXN   | adenylosuccinate synthetase                                 | $\text{inosine-5'-phosphate} + GTP + \text{L-aspartate} \rightarrow \text{phosphate} + GDP + \text{adenylo-succinate}$                                        | M                                |
| HISTPRATPHYD-RXN                | Phosphoribosyl-ATP pyrophosphatase                          | $H_2O + \text{phosphoribosyl-ATP} \rightarrow \text{phosphoribosyl-AMP} + \text{diphosphate}$                                                                 | M                                |
| PYRIMSYN1-RXN                   | NA                                                          | $5\text{-aminoimidazole ribonucleotide} \rightarrow \text{hydroxymethylpyrimidine phosphate}$                                                                 | M                                |
| PNPOXI-RXN                      | NA                                                          | $\text{pyridoxine-5'-phosphate} + \text{oxygen} \rightarrow H_2O_2 + \text{pyridoxal 5'-phosphate}$                                                           | M                                |
| DETHIOBIOTIN-SYN-RXN            | dethiobiotin synthetase                                     | $7,8\text{-diaminopelargonate} + ATP + CO_2 \rightarrow ADP + \text{phosphate} + \text{dethiobiotin}$                                                         | M                                |
| IMIDPHOSDEHYD-RXN               | Imidazoleglycerol-phosphate dehydratase                     | $\text{D-erythro-imidazole-glycerol-phosphate} \rightarrow \text{imidazole acetol-phosphate} + H_2O$                                                          | M                                |
| RXN-6282                        | NA                                                          | $H_2O + 5,10\text{-methenyl-tetrahydropteroyl-}[\gamma\text{-Glu}](n) \rightarrow \text{an N10-formyl-tetrahydrofolate}$                                      | M                                |
| PRPPSYN-RXN                     | ribose-phosphate diphosphokinase                            | $\text{D-ribose-5-phosphate} + ATP \rightarrow 5\text{-phosphoribosyl 1-pyrophosphate} + AMP$                                                                 | M                                |
| GMP-SYN-GLUT-RXN                | GMP synthetase (glutamine-hydrolysing)                      | $L\text{-glutamine} + H_2O + \text{xanthosine-5-phosphate} + ATP \rightarrow \text{GMP} + \text{diphosphate} + L\text{-glutamate} + AMP$                      | M                                |
| DAPASYN-RXN                     | Adenosylmethionine--8-amino-7-oxononanoate aminotransferase | $7\text{-keto-8-aminopelargonate} + S\text{-adenosyl-L-methionine} \rightarrow 7,8\text{-diaminopelargonate} + S\text{-adenosyl-4-methylthio-2-oxobutanoate}$ | M                                |
| FPPSYN-RXN                      | Geranyl transtransferase                                    | $\text{geranyl-diphosphate} + \text{isopentenyl diphosphate} \rightarrow \text{diphosphate} + (E,E)\text{-farnesyl diphosphate}$                              | T                                |
| RXN-8001                        | NA                                                          | $NAD^+ + \text{histidinol} \rightarrow H^+ + NADH + \text{L-histidine}$                                                                                       | T                                |
| PANTOATE-BETA-ALANINE-LIG-RXN   | Pantoate--beta-alanine ligase                               | $\text{beta-alanine} + ATP + \text{L-pantoate} \rightarrow \text{pantothenate} + \text{diphosphate} + AMP$                                                    | M                                |
| ACSERLY-RXN                     | Cysteine synthase                                           | $O\text{-acetyl-L-serine} + \text{hydrogen sulfide} \rightarrow \text{acetate} + \text{L-cysteine}$                                                           | M                                |
| O-SUCCHOMOSERLYASE-RXN          | O-succinyl homoserine (thiol)-lyase                         | $O\text{-succinyl-L-homoserine} + \text{L-cysteine} \rightarrow \text{cystathionine} + \text{succinate}$                                                      | M                                |



| Reaction BioCyc ID        | Name                                                      | Formula                                                                                                                                                                                 | Evidence to assign the direction |
|---------------------------|-----------------------------------------------------------|-----------------------------------------------------------------------------------------------------------------------------------------------------------------------------------------|----------------------------------|
| CDPKIN-RXN                | NA                                                        | <b>CDP + ATP ↔ ADP + CTP</b>                                                                                                                                                            |                                  |
| RIB5PISOM-RXN             | Ribose 5-phosphate epimerase                              | <b>D-ribose-5-phosphate ← D-ribulose-5-phosphate</b>                                                                                                                                    | T                                |
| 2.8.1.6-RXN               | biotin synthase                                           | a sulfurated sulfur donor + <b>dethiobiotin</b> + S-adenosyl-L-methionine + a sulfur donor → <b>biotin</b> + 5'- <b>deoxyadenosine</b> + an unsulfurated sulfur acceptor + L-methionine | M                                |
| SERINE-O-ACETTRAN-RXN     | Serine O-acetyltransferase                                | <b>L-serine</b> + acetyl-CoA → coenzyme A + <b>O-acetyl-L-serine</b>                                                                                                                    | M                                |
| QUINOPRIBOTRANS-RXN       | Nicotinate-nucleotide pyrophosphorylase (carboxylating)   | diphosphate + <b>nicotinate nucleotide</b> + CO <sub>2</sub> ← <b>quinolinate</b> + 5-phosphoribosyl 1-pyrophosphate                                                                    | T                                |
| RIBOFLAVINSYNREDUC-RXN    | NA                                                        | H <sup>+</sup> + NADPH + 5-amino-6-(5'- <b>phosphoribosylamino</b> )uracil → 5-amino-6-(5'- <b>phosphoribitylamino</b> )uracil + NADP <sup>+</sup>                                      | M                                |
| HISTOLDEHYD-RXN           | Histidinol dehydrogenase                                  | NAD <sup>+</sup> + <b>histidinol</b> → <b>histidinal</b> + NADH                                                                                                                         | M                                |
| RXN-3742                  | NA                                                        | <b>L-glutamate</b> + ATP + a <b>folylpolyglutamate(n)</b> → ADP + phosphate + a <b>folylpolyglutamate(n)</b>                                                                            | M                                |
| SHIKIMATE-KINASE-RXN      | shikimate-kinase                                          | ATP + <b>shikimate</b> → ADP + <b>shikimate-3-phosphate</b>                                                                                                                             | M                                |
| GLYC3PDEHYDROGBIOSYN-RXN  | Glycerol-3-phosphate dehydrogenase (NAD(P) <sup>+</sup> ) | H <sup>+</sup> + <b>dihydroxy-acetone phosphate</b> + NAD(P)H → NAD(P) <sup>+</sup> + <b>sn-glycerol-3-phosphate</b>                                                                    | M                                |
| METHENYLTHFCYCLOHYDRO-RXN | Methenyl tetrahydrofolate cyclohydrolase                  | <b>5,10-methenyltetrahydrofolate</b> + H <sub>2</sub> O ↔ <b>10-formyl-tetrahydrofolate</b>                                                                                             |                                  |
| PHOSGLYPHOS-RXN           | Phosphoglycerate kinase                                   | <b>3-phosphoglycerate</b> + ATP ← ADP + <b>1,3-diphosphateglycerate</b>                                                                                                                 | T                                |
| 6PGLUCONDEHYDROGRXN       | Phosphogluconate dehydrogenase (decarboxylating)          | NAD(P) <sup>+</sup> + <b>6-phospho-D-gluconate</b> → <b>D-ribulose-5-phosphate</b> + NAD(P)H + CO <sub>2</sub>                                                                          | M                                |
| 2PGADEHYDRAT-RXN          | Phosphopyruvate hydratase                                 | <b>2-phosphoglycerate</b> → H <sub>2</sub> O + <b>phosphoenolpyruvate</b>                                                                                                               | T                                |
| CTPSYN-RXN                | CTP synthetase                                            | L-glutamine + H <sub>2</sub> O + ATP + <b>UTP</b> → ADP + phosphate + L-glutamate + <b>CTP</b>                                                                                          | M                                |
| UROPORIIIMETHYLTRANSA-RXN | NA                                                        | <b>uroporphyrinogen-III</b> + S-adenosyl-L-methionine → S-adenosyl-L-homocysteine + <b>precorrin-1</b>                                                                                  | M                                |
| NAD-SYNTH-GLN-RXN         | NAD(+) synthetase (glutamine-hydrolysing)                 | L-glutamine + H <sub>2</sub> O + <b>deamido-NAD</b> + ATP → diphosphate + <b>NAD<sup>+</sup></b> + L-glutamate + AMP                                                                    | M                                |
| FORMYLTHFGLUSYNTH-RXN     | NA                                                        | <b>L-glutamate</b> + ATP + an <b>N10-formyl-tetrahydrofolate</b> → ADP + phosphate + an <b>N10-formyl-tetrahydrofolate</b>                                                              | M                                |

| Reaction BioCyc ID             | Name                                                                                   | Formula                                                                                                                            | Evidence to assign the direction |
|--------------------------------|----------------------------------------------------------------------------------------|------------------------------------------------------------------------------------------------------------------------------------|----------------------------------|
| HISTIDPHOS-RXN                 | Histidinol-phosphatase                                                                 | H <sub>2</sub> O + <b>L-histidinol-phosphate</b> → phosphate + <b>histidinol</b>                                                   | M                                |
| 1TRANSKETO-RXN                 | Transketolase                                                                          | <b>D-xylulose-5-phosphate + D-ribose-5-phosphate</b> → <b>D-sedoheptulose-7-phosphate + D-glyceraldehyde-3-phosphate</b>           | T                                |
| NAD-KIN-RXN                    | NAD(+) kinase                                                                          | <b>NAD<sup>+</sup> + ATP</b> → ADP + <b>NADP<sup>+</sup></b>                                                                       | M                                |
| PHOSPHASERSYN-RXN              | CDP-diacylglycerol--serine O-phosphatidyltransferase                                   | <b>a CDP-diacylglycerol + L-serine</b> → <b>an L-1-phosphatidylserine + CMP</b>                                                    | M                                |
| GUANYL-KIN-RXN                 | Guanylate kinase                                                                       | <b>GMP + ATP</b> → ADP + <b>GDP</b>                                                                                                | M                                |
| RXN0-5234                      | NA                                                                                     | <b>threonine</b> ↔ <b>acetaldehyde + glycine</b>                                                                                   |                                  |
| RXN-8973                       | UDP-N-acetylmuramoyl alanyl-D-glutamyl-2,6-diaminopimelate--D-alanyl- D-alanine ligase | <b>a UDP-N-acetylmuramoyl-tripeptide + D-alanyl-D-alanine + ATP</b> → ADP + phosphate + <b>a UDP-N-acetylmuramoyl-pentapeptide</b> | M                                |
| RXN-8972BIS                    | UDP-N-acetylmuramoyl alanyl-D-glutamate--2,6-diaminopimelate ligase                    | <b>L-lysine + UDP-N-acetylmuramoyl-L-alanyl-D-glutamate + ATP</b> → <b>a UDP-N-acetylmuramoyl-tripeptide + ADP + phosphate</b>     | M                                |
| IMP-DEHYDROG-RXN               | IMP dehydrogenase                                                                      | <b>inosine-5'-phosphate + H<sub>2</sub>O + NAD<sup>+</sup></b> → <b>xanthosine-5-phosphate + NADH</b>                              | M                                |
| UNDECAPRENYL-DIPHOSPHATASE-RXN | Undecaprenyl-diphosphatase                                                             | H <sub>2</sub> O + <b>di-trans,poly-cis-undecaprenyl diphosphate</b> → phosphate + <b>undecaprenyl phosphate</b>                   | M                                |
| RXN0-5240                      | NA                                                                                     | <b>D-alanine + pyridoxal 5'-phosphate</b> → <b>pyruvate + pyridoxamine 5'-phosphate</b>                                            | T                                |
| DIOHBUTANONEPSYN-RXN           | NA                                                                                     | <b>D-ribulose-5-phosphate</b> → <b>formate + 3,4-dihydroxy-2-butanone-4-P</b>                                                      | M                                |
| DGDPKIN-RXN                    | NA                                                                                     | <b>dGDP + ATP</b> → <b>dGTP + ADP</b>                                                                                              | M                                |
| 3PGAREARR-RXN                  | Phosphoglycerate mutase                                                                | <b>3-phosphoglycerate</b> → <b>2-phosphoglycerate</b>                                                                              | T                                |
| SHIKIMATE-5-DEHYDROGENASE-RXN  | Shikimate 5-dehydrogenase                                                              | <b>3-dehydro-shikimate + NADPH</b> → <b>shikimate + NADP<sup>+</sup></b>                                                           | M                                |
| NICONUCADENYLYLTRAN-RXN        | Nicotinate-nucleotide adenylyl transferase                                             | <b>nicotinate nucleotide + ATP</b> → diphosphate + <b>deamido-NAD</b>                                                              | M                                |
| DIAMINOPIMEPIM-RXN             | Diaminopimelate epimerase                                                              | <b>L,L-diaminopimelate</b> → <b>meso-diaminopimelate</b>                                                                           | M                                |
| GLYRIBONUCSYN-RXN              | Phosphoribosyl amine--glycine ligase                                                   | ATP + <b>glycine + 5-phospho-beta-D-ribosyl-amine</b> → ADP + phosphate + <b>5-phospho-ribosyl-glycineamide</b>                    | M                                |

| Reaction BioCyc ID              | Name                                                                                               | Formula                                                                                                                                                   | Evidence to assign the direction |
|---------------------------------|----------------------------------------------------------------------------------------------------|-----------------------------------------------------------------------------------------------------------------------------------------------------------|----------------------------------|
| CDPDIGLYSYN-RXN                 | phosphatidate cytidylyl transferase                                                                | <b>an L-phosphatidate</b> + CTP → <b>a CDP-diacylglycerol</b> + diphosphate                                                                               | M                                |
| RXN-6321                        | NA                                                                                                 | <b>5,10-methenyltetrahydrofolate</b> + H <sub>2</sub> O → <b>5-formyl-tetrahydrofolate</b>                                                                | M                                |
| UDPNACETYLMURAMA TEDEHYDROG-RXN | UDP-N-acetylmuramate dehydrogenase                                                                 | NADPH + <b>UDP-GlcNAc-enolpyruvate</b> → <b>UDP-N-acetylmuramate</b> + NADP <sup>+</sup>                                                                  | M                                |
| FUMHYDR-RXN                     | Fumarate hydratase                                                                                 | <b>Malate</b> ← H <sub>2</sub> O + <b>fumarate</b>                                                                                                        | T                                |
| OHMETHYLBILANESYN-RXN           | Hydroxy methylbilane synthase                                                                      | H <sub>2</sub> O + <b>porphobilinogen</b> → ammonia + <b>hydroxymethylbilane</b>                                                                          | M                                |
| RXN-8998                        | NA                                                                                                 | <b>di-trans,poly-cis-nonaprenyl diphosphate</b> + <b>isopentenyl diphosphate</b> → <b>di-trans,poly-cis-decaprenyl diphosphate</b> + diphosphate          | M                                |
| RXN-8997                        | NA                                                                                                 | <b>isopentenyl diphosphate</b> + <b>di-trans,poly-cis-octaprenyl diphosphate</b> → <b>di-trans,poly-cis-nonaprenyl diphosphate</b> + diphosphate          | M                                |
| RXN-8999                        | NA                                                                                                 | <b>di-trans,poly-cis-decaprenyl diphosphate</b> + <b>isopentenyl diphosphate</b> → diphosphate + <b>di-trans,poly-cis-undecaprenyl diphosphate</b>        | M                                |
| RXN-8994                        | NA                                                                                                 | <b>isopentenyl diphosphate</b> + <b>di-trans,poly-cis-pentaprenyl diphosphate</b> → diphosphate + <b>di-trans,poly-cis-hexaprenyl diphosphate</b>         | M                                |
| PRIBFAICARPISOM-RXN             | N-(5'-phospho-D-riboseylformimino)-5-amino-1-(5"-phosphoribosyl)-4-imidazole carboxamide isomerase | <b>phosphoribosylformiminoAICAR-phosphate</b> → <b>phosphoribulosylformimino-AICAR-P</b>                                                                  | M                                |
| RXN-8993                        | NA                                                                                                 | <b>isopentenyl diphosphate</b> + <b>2-cis,6-trans,10-transgeranylgeranyl diphosphate</b> → diphosphate + <b>di-trans,poly-cis-pentaprenyl diphosphate</b> | M                                |
| RXN-8996                        | NA                                                                                                 | <b>isopentenyl diphosphate</b> + <b>di-trans,poly-cis-heptaprenyl diphosphate</b> → diphosphate + <b>di-trans,poly-cis-octaprenyl diphosphate</b>         | M                                |
| 6PFRUCTPHOS-RXN                 | 6-phospho fructokinase                                                                             | <b>fructose-6-phosphate</b> + ATP → ADP + <b>fructose-1,6-bisphosphate</b>                                                                                | M                                |
| CYSTATIONINE-BETA-LYASE-RXN     | Cystathionine beta-lyase                                                                           | <b>cystathionine</b> + H <sub>2</sub> O → ammonia + <b>pyruvate</b> + <b>L-homocysteine</b>                                                               | M                                |
| RXN-8995                        | NA                                                                                                 | <b>isopentenyl diphosphate</b> + <b>di-trans,poly-cis-hexaprenyl diphosphate</b> → diphosphate + <b>di-trans,poly-cis-heptaprenyl diphosphate</b>         | M                                |
| CMPKI-RXN                       | Cytidylate kinase                                                                                  | ATP + <b>CMP</b> → ADP + <b>CDP</b>                                                                                                                       | M                                |
| 2.3.1.157-RXN                   | Glucosamine-1-phosphate N-acetyltransferase                                                        | acetyl-CoA + <b>D-glucosamine 1-phosphate</b> → coenzyme A + <b>N-acetyl-glucosamine-1-phosphate</b>                                                      | M                                |

| Reaction BioCyc ID           | Name                                                                | Formula                                                                                                                                                                  | Evidence to assign the direction |
|------------------------------|---------------------------------------------------------------------|--------------------------------------------------------------------------------------------------------------------------------------------------------------------------|----------------------------------|
| PHOSPHAGLYPSYN-RXN           | CDP-diacylglycerol--glycerol-3-phosphate 3-phosphatidyl transferase | <b>a CDP-diacylglycerol + sn-glycerol-3-phosphate → an L-1-phosphatidylglycerol-phosphate + CMP</b>                                                                      | M                                |
| ISPH2-RXN                    | NA                                                                  | <b>H<sup>+</sup> + 1-hydroxy-2-methyl-2-(E)-butenyl 4-diphosphate + NAD(P)H → NAD(P)<sup>+</sup> + H<sub>2</sub>O + isopentenyl diphosphate</b>                          | M                                |
| AIRS-RXN                     | Phosphoribosyl formyl glycinamide cyclo-ligase                      | <b>5-phosphoribosyl-N-formylglycineamide + ATP → ADP + phosphate + 5-aminoimidazole ribonucleotide</b>                                                                   | M                                |
| OROPRIBTRANS-RXN             | Orotate phosphoribosyl transferase                                  | <b>orotate + 5-phosphoribosyl 1-pyrophosphate → diphosphate + orotidine-5'-phosphate</b>                                                                                 | M                                |
| 2.5.1.19-RXN                 | 3-phosphoshikimate 1-carboxyvinyl transferase                       | <b>phosphoenolpyruvate + shikimate-3-phosphate → phosphate + 5-enolpyruvyl-shikimate-3-phosphate</b>                                                                     | M                                |
| PYRUVDEH-RXN                 | NA                                                                  | coenzyme A + NAD <sup>+</sup> + <b>pyruvate</b> → NADH + <b>acetyl-CoA</b> + CO <sub>2</sub>                                                                             | M                                |
| FOLYLPOLYGLUTAMAT ESYNTH-RXN | Folyl polyglutamate synthetase                                      | <b>L-glutamate + ATP + a tetrahydrofolate polyglutamate</b> → ADP + phosphate + <b>a tetrahydrofolate polyglutamate</b>                                                  | M                                |
| PANTOTHENATE-KIN-RXN         | Pantothenate kinase                                                 | <b>pantothenate + ATP → D-4'-phosphopantothenate + ADP</b>                                                                                                               | M                                |
| AICARTRANSFORM-RXN           | Phosphoribosyl aminoimidazole carboxamide formyltransferase         | 10-formyl-tetrahydrofolate + <b>aminoimidazole carboxamide ribonucleotide</b> → <b>phosphoribosyl-formamido-carboxamide</b> + tetrahydrofolate                           | M                                |
| GDPREDUCT-RXN                | NA                                                                  | <b>GDP</b> + a reduced thioredoxin → <b>dGDP</b> + H <sub>2</sub> O + an oxidized thioredoxin                                                                            | M                                |
| RXN0-884                     | NA                                                                  | <b>H<sup>+</sup> + 1-hydroxy-2-methyl-2-(E)-butenyl 4-diphosphate + NAD(P)H → NAD(P)<sup>+</sup> + H<sub>2</sub>O + dimethylallyl-diphosphate</b>                        | M                                |
| DXPREDISOM-RXN               | NA                                                                  | NADPH + <b>1-deoxy-D-xylulose 5-phosphate</b> → <b>2-C-methyl-D-erythritol-4-phosphate</b> + NADP <sup>+</sup>                                                           | M                                |
| RXN0-882                     | NA                                                                  | <b>2-C-methyl-D-erythritol-2,4-cyclodiphosphate</b> + a protein dithiol → H <sub>2</sub> O + <b>1-hydroxy-2-methyl-2-(E)-butenyl 4-diphosphate</b> + a protein disulfide | M                                |
| 2TRANSKETO-RXN               | Transketolase                                                       | <b>D-xylulose-5-phosphate + D-erythrose-4-phosphate → D-glyceraldehyde-3-phosphate + fructose-6-phosphate</b>                                                            | T                                |
| GART-RXN                     | Phosphoribosyl glycinamide formyltransferase                        | <b>5-phospho-ribosyl-glycineamide</b> + 10-formyl-tetrahydrofolate → <b>5'-phosphoribosyl-N-formylglycineamide</b> + tetrahydrofolate                                    | M                                |

| Reaction BioCyc ID                                | Name                                                       | Formula                                                                                                                                                                     | Evidence to assign the direction |
|---------------------------------------------------|------------------------------------------------------------|-----------------------------------------------------------------------------------------------------------------------------------------------------------------------------|----------------------------------|
| 2.7.1.148-RXN                                     | 4-(cytidine 5'-diphospho)-2-C-methyl-D-erythritol kinase   | <b>4-(cytidine 5'-diphospho)-2-C-methyl-D-erythritol</b> + ATP → ADP + <b>2-phospho-4-(cytidine 5'-diphospho)-2-C-methyl-D-erythritol</b>                                   | M                                |
| LUMAZINESYN-RXN                                   | NA                                                         | <b>3,4-dihydroxy-2-butanone-4-P</b> + <b>5-amino-6-ribitylamino-2,4(1H,3H)-pyrimidinedione</b> → H <sub>2</sub> O + phosphate + <b>6,7-dimethyl-8-(1-D-ribityl)lumazine</b> | M                                |
| 3-CH3-2-OXOBUTANOATE-OH-CH3-XFER-RXN              | 3-methyl-2-oxobutanoate hydroxy methyltransferase          | H <sub>2</sub> O + 5,10-methylene-THF + <b>2-keto-isovalerate</b> → <b>2-dehydropantoate</b> + tetrahydrofolate                                                             | M                                |
| GAPOXNPHOSPHN-RXN                                 | Glyceraldehyde 3-phosphate dehydrogenase (phosphorylating) | phosphate + NAD <sup>+</sup> + <b>D-glyceraldehyde-3-phosphate</b> → NADH + <b>1,3-diphosphateglycerate</b>                                                                 | T                                |
| HISTCYCLOHYD-RXN                                  | Phosphoribosyl-AMP cyclohydrolase                          | H <sub>2</sub> O + <b>phosphoribosyl-AMP</b> → <b>phosphoribosylformiminoAICAR-phosphate</b>                                                                                | M                                |
| RXN0-742                                          | NA                                                         | HCO <sub>3</sub> <sup>-</sup> + <b>5-aminoimidazole ribonucleotide</b> + ATP → ADP + phosphate + <b>N5-carboxyaminoimidazole ribonucleotide</b>                             | M                                |
| UDP-NACMUR-ALA-LIG-RXN                            | UDP-N-acetylmuramate--alanine ligase                       | <b>UDP-N-acetylmuramate</b> + <b>L-alanine</b> + ATP → ADP + phosphate + <b>UDP-N-acetylmuramoyl-L-alanine</b>                                                              | M                                |
| RXN0-743                                          | NA                                                         | <b>N5-carboxyaminoimidazole ribonucleotide</b> → <b>4-carboxyaminoimidazole ribonucleotide</b>                                                                              | M                                |
| SULITE-REDUCT-RXN                                 | Sulfite reductase (NADPH)                                  | sulfite → hydrogen sulfide                                                                                                                                                  | M                                |
| HYDROGENSULFITE__45__REDUCTASE__45__RXN           | Hydrogen sulfite reductase                                 | bisulfite → trithionate + OH <sup>-</sup>                                                                                                                                   | M                                |
| RXN__45__8315                                     | NA                                                         | sulfite → bisulfite                                                                                                                                                         | M                                |
| ADENYLYLSULFKIN__45__RXN                          | Adenylyl sulfate kinase                                    | adenosine 5'-phosphosulfate → phosphoadenosine-5'-phosphosulfate                                                                                                            | M                                |
| _1__46__8__46__4__46__8__45__RXN                  | Phospho adenylyl-sulfate reductase (thioredoxin)           | phosphoadenosine-5'-phosphosulfate → adenosine-3',5'-bisphosphate + sulfite                                                                                                 | M                                |
| ADENYLYLSULFKIN__45__RXN                          | Adenylyl sulfate kinase                                    | adenosine 5'-phosphosulfate → phosphoadenosine-5'-phosphosulfate                                                                                                            | M                                |
| SULFATE__45__ADENYLYLTRANS__45__RXN               | Sulfate adenylyl transferase                               | sulfate + ATP → adenosine 5'-phosphosulfate                                                                                                                                 | M                                |
| _325__45__BISPHOSPHATE__45__NUCLEOTIDASE__45__RXN | 3'(2'),5'-bisphosphate nucleotidase                        | adenosine-3',5'-bisphosphate → AMP                                                                                                                                          | M                                |
| SUPEROX__45__DISMUT__45__RXN                      | Superoxide dismutase                                       | O <sub>2</sub> <sup>-</sup> → H <sub>2</sub> O <sub>2</sub>                                                                                                                 | M                                |
| RXN0__45__1241                                    | NA                                                         | L-glutamine → N5-methyl-L-glutamine                                                                                                                                         | M                                |

| <b>Reaction BioCyc ID</b> | <b>Name</b>                    | <b>Formula</b>                                                                     | <b>Evidence to assign the direction</b> |
|---------------------------|--------------------------------|------------------------------------------------------------------------------------|-----------------------------------------|
| PMPOXI_45_RXN             | Pyridoxamine-phosphate oxidase | pyridoxamine 5'-phosphate → H <sub>2</sub> O <sub>2</sub> + pyridoxal 5'-phosphate | M                                       |
